# Supplementary material for: Linkage and Association Mapping of Arabidopsis thaliana Flowering Time in Nature
Source: PLoS Genet. 2010 May 6;6(5):e1000940. doi: 10.1371/journal.pgen.1000940 (PMC2865524; doi:10.1371/journal.pgen.1000940)
Supplement: Figure S5 — Network of additive and epistatic QTLs for flowering time for each RIL family. (0.38 MB PDF) [file pgen.1000940.s006.pdf]

● QTL with additive effect

● QTL without individual effect

— Epistatic interaction between QTL

Support interval for QTL position

Bla-1 x Col-0 (2RV)

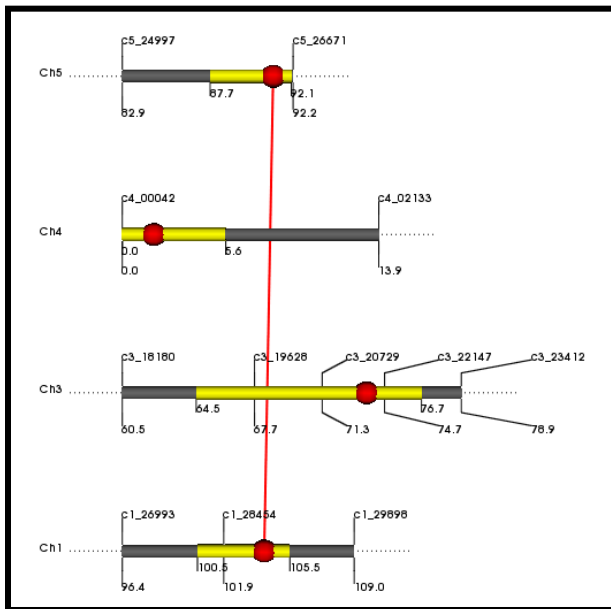

Tsu-0 x Col-0 (3RV)

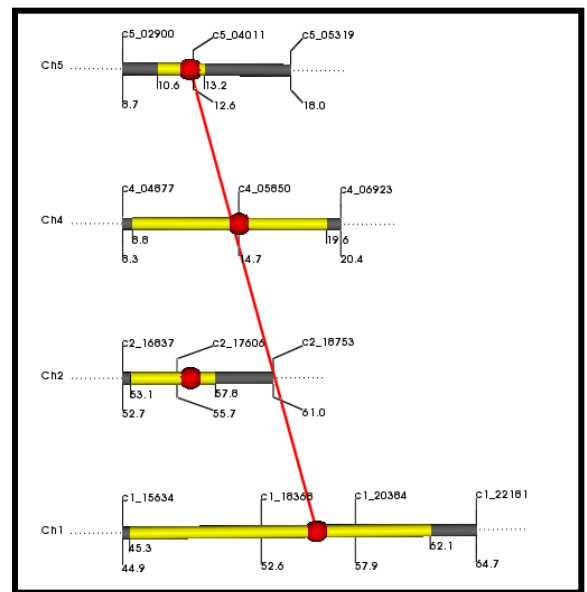

Nok-1 x Col-0 (4RV)

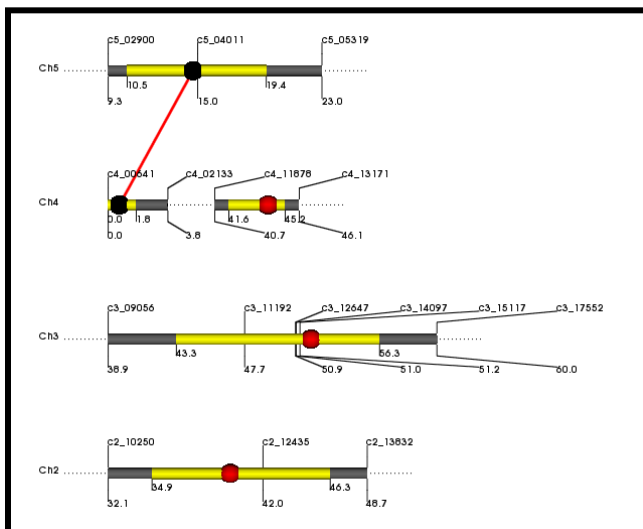

Ct-1 x Col-0 (7RV)

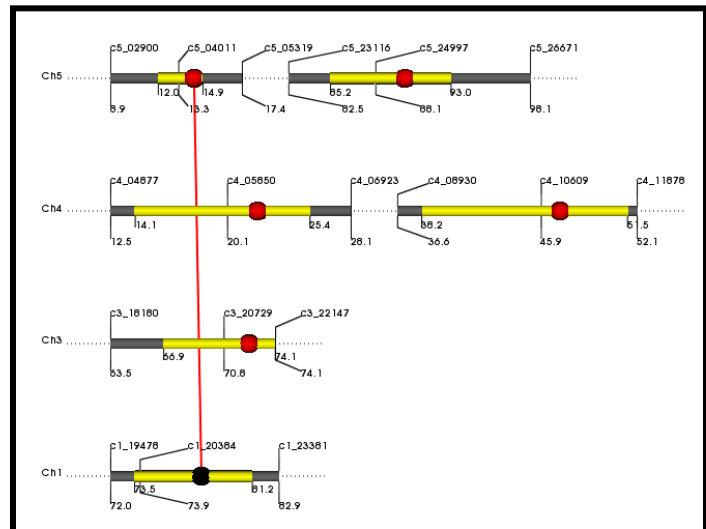

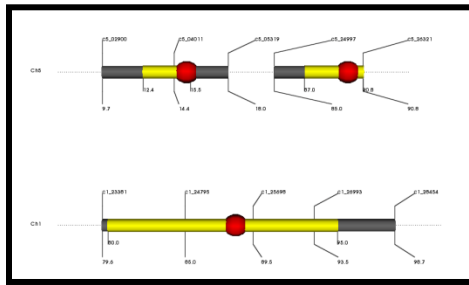

Ri-0 x Col-0 (6RV)

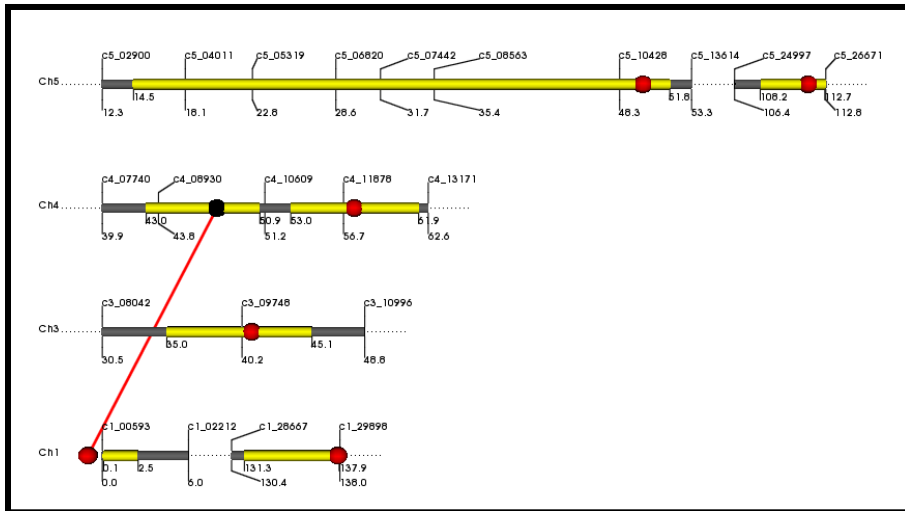

Cvi-0 x Col-0 (8RV)

Ge-0 x Col-0 (17RV)

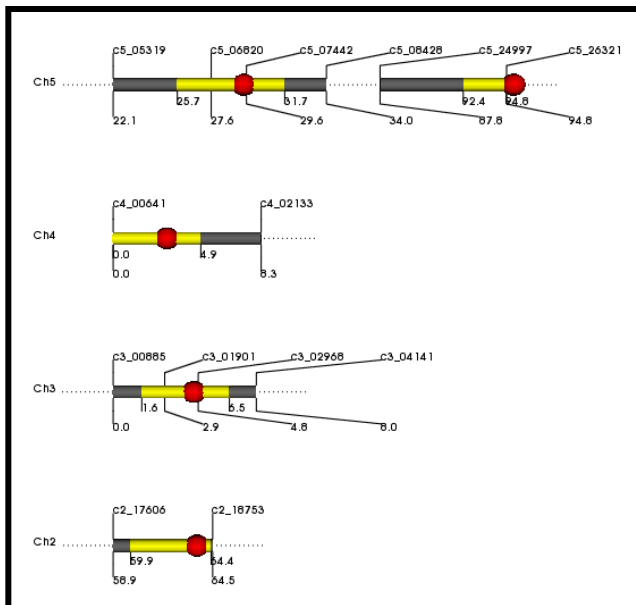

Shahdara x Col-0 (13RV)

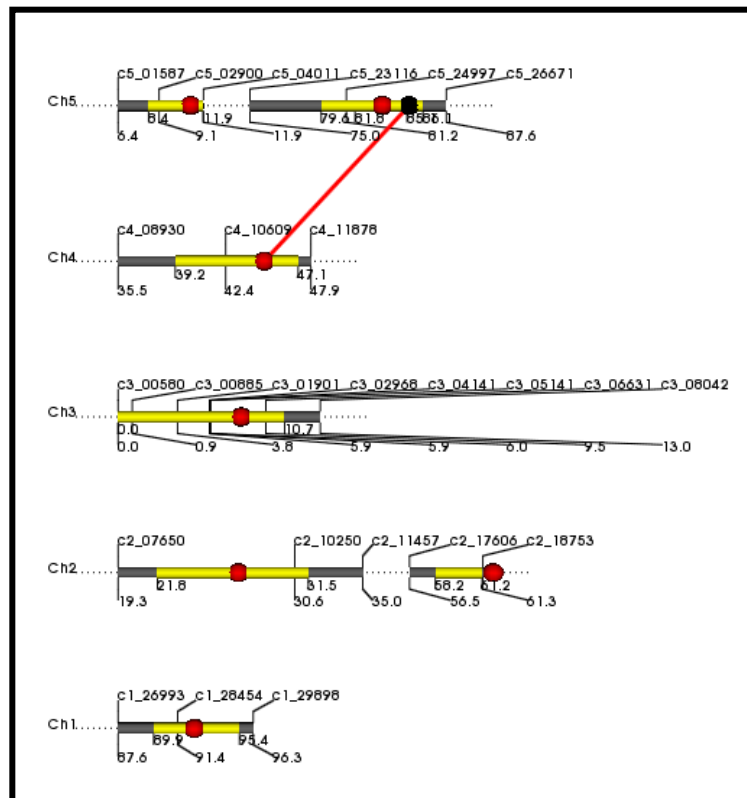

## Yo-0 x Col-0 (23RV)

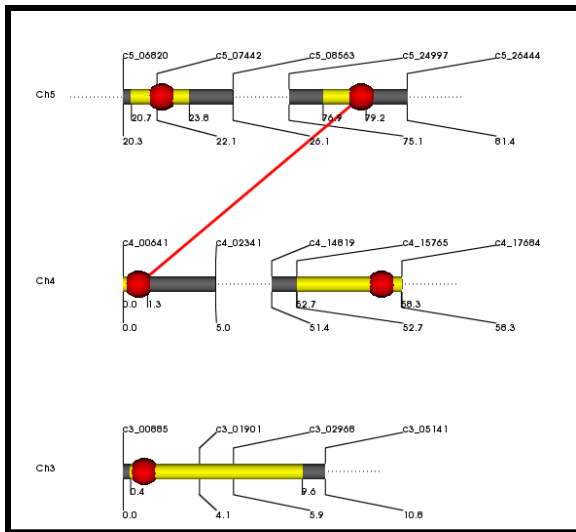

## Blh-1 x Col-0 (21RV)

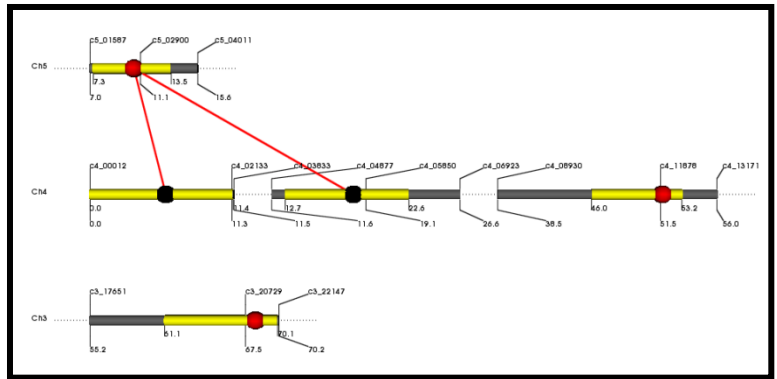

## Can-0 x Col-0 (19RV)

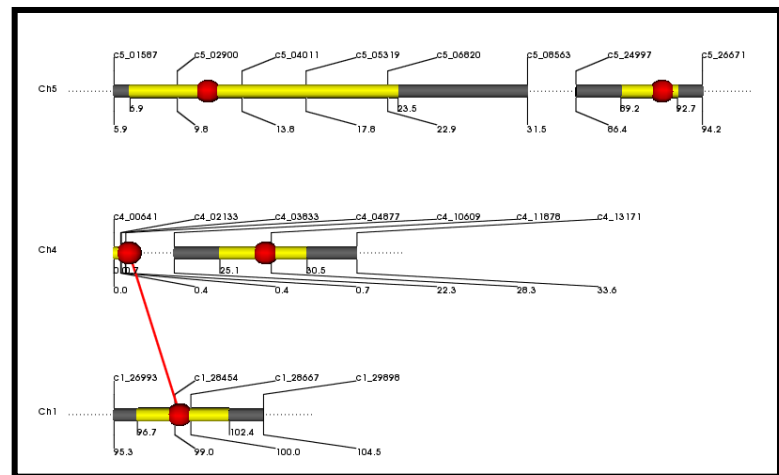

## Bur-0 x Col-0 (20RV)

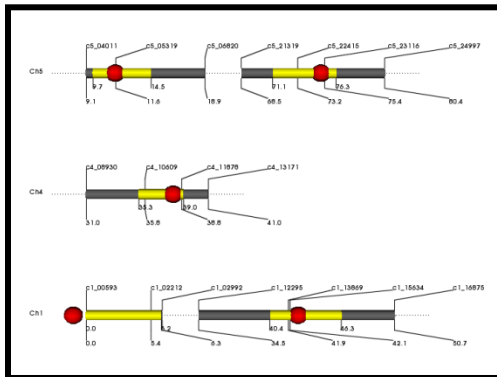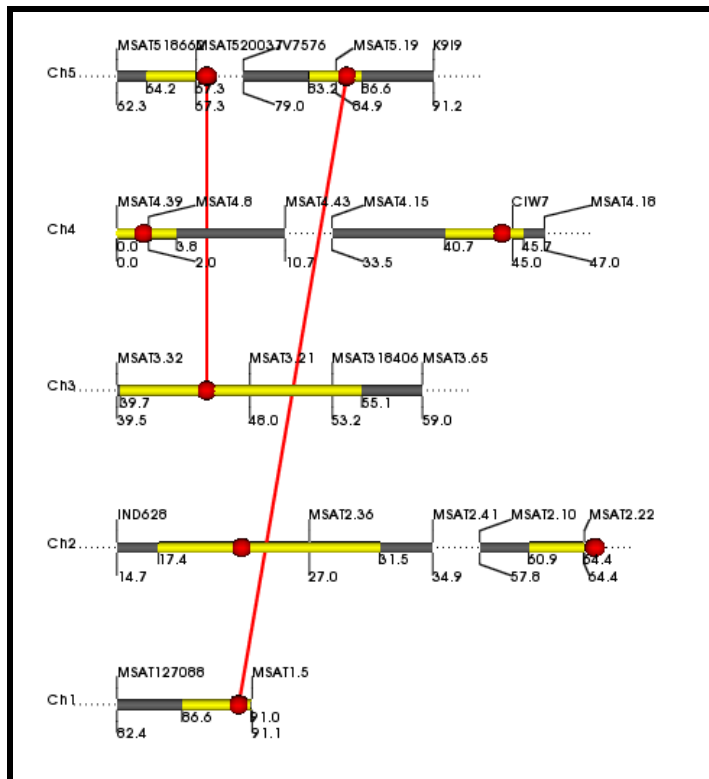

## Bay-0 x Shahdara (33RV)
