# Supplementary material for: Linkage and Association Mapping of Arabidopsis thaliana Flowering Time in Nature
Source: PLOS journal article supplement (doi:10.1371/journal.pgen.1000940), 2010-05-06
Supplement: S1 (10.1371/journal.pgen.1000940.s001) [file journal.pgen.1000940.s001.pdf › journal.pgen.1000940.s001.pdf]

**Table 1.** List of natural worldwide accessions and RIL parental lines used in this study.

| Material | Name          | latitude | longitude | 2008-2009 | 216kSNPs | FRI | NF FRI allele | PHYC | FLC | FLC <sub>A</sub> -FLC <sub>B</sub> |
|----------|---------------|----------|-----------|-----------|----------|-----|---------------|------|-----|------------------------------------|
| NA       | Ag-0          | 45       | 1.3       | x         | X        | F   |               | 0    | AA  | A                                  |
| NA       | Alc-0         | 40.31    | -3.22     | x         | X        | NF  |               | 0    | WA  | A                                  |
| NA       | Algutsrum     | 56.68    | 16.5      | x         | X        | F   |               | 1    | AA  | .                                  |
| NA       | An-1          | 51.22    | 4.4       | x         | X        | NF  | P             | 0    | AA  | A                                  |
| NA       | Ang-0         | 50.3     | 5.3       | x         | X        | NF  | S/T           | 0    | AA  | A                                  |
| NA       | Bå1-2         | 56.4     | 12.9      | x         | X        | F   |               | 1    | AA  | B                                  |
| NA       | Bå3-3         | 56.4     | 12.9      | x         |          | F   |               | 1    | AA  | A                                  |
| NA       | Bå4-1         | 56.4     | 12.9      | x         | X        | F   |               | 0    | AA  | A                                  |
| NA       | Bå5-1         | 56.4     | 12.9      | x         | X        | F   |               | 0    | AA  | A                                  |
| NA       | Bay-0         | 49       | 11        | x         | X        | NF  | B             | 1    | AA  | B                                  |
| NA       | Bg-2          | 47.65    | -122.31   |           | X        | NF  | H             | 0    | AA  | A                                  |
| NA       | Bil-5         | 63.32    | 18.48     | x         | X        | F   |               | 1    | AA  | A                                  |
| NA       | Bil-7         | 63.32    | 18.48     | x         | X        | F   |               | 1    | AA  | A                                  |
| NA       | Bla-1         | 41.68    | 2.8       | x         | X        | F   |               | 0    | ND  | A                                  |
| NA       | Blh-1         | 48       | 19        | x         |          | NF  | L             | 0    | AA  | B                                  |
| NA       | Boo2-1        | 55.86    | 13.51     | x         | X        | F   |               | 1    | AA  | A                                  |
| NA       | Bor-1         | 49.4     | 16.23     | x         | X        | F   |               | 0    | ND  | A                                  |
| NA       | Bor-4         | 49.4     | 16.23     | x         | X        | F   |               | 0    | ND  | A                                  |
| NA       | Br-0          | 49.2     | 16.62     | x         | X        | F   |               | -    | AA  | A                                  |
| NA       | Brö1-6        | 56.3     | 16        | x         | X        | F   |               | 1    | AA  | A                                  |
| NA       | Bs-1          | 47.5     | 7.5       | x         | X        | NF  | B             | 0    | AA  | B                                  |
| NA       | Bu-0          | 50.5     | 9.5       | x         | X        | NF  | L             | 0    | AA  | A                                  |
| NA       | Buckhorn Pass | 41.36    | -122.76   | x         | X        |     |               | 0    | AA  | A                                  |
| NA       | Bur-0         | 54.1     | -6.2      | x         | X        | F   |               | 0    | AA  | A                                  |
| NA       | C24           | 40.21    | -8.43     | x         | X        | F   |               | 0    | WA  | A                                  |
| NA       | Can-0         | 29.21    | -13.48    | x         | X        | F   |               | 0    | AA  | A                                  |
| NA       | Cen-0         | 49       | 0.5       | x         | X        | F   |               | 1    | AA  | A                                  |
| NA       | CIBC-17       | 51.41    | -0.64     | x         | X        | F   |               | 0    | AA  | A                                  |
| NA       | CIBC-5        | 51.41    | -0.64     | x         | X        | F   |               | 0    | AA  | A                                  |
| NA       | Co            |          |           | x         | X        | NF  | R             | 0    | AA  | A                                  |
| NA       | Col-0         | 38.3     | -92.3     | x         | X        | NF  | L             | 1    | AA  | A                                  |
| NA       | CS22491       | 61.36    | 34.15     | x         | X        | F   |               | 0    | ND  | B                                  |
| NA       | Ct-1          | 37.3     | 15        | x         | X        | NF  | B             | 0    | AA  | B                                  |
| NA       | Cvi-0         | 15.11    | -23.62    | x         | X        | NF  | I             | 0    | AA  | A                                  |
| NA       | Dem-4         | 41.19    | -87.19    | x         | X        | F   |               | 0    | AA  | A                                  |
| NA       | Dra-3-1       | 55.76    | 14.12     | x         | X        | F   |               | 1    | AA  | A                                  |
| NA       | Drall-1       | 49.41    | 16.28     | x         | X        | F   |               | 0    | AA  | A                                  |
| NA       | Drall-1       | 49.41    | 16.28     | x         | X        | F   |               | 1    | WA  | A                                  |
| NA       | Duk           | 49.1     | 16.2      | x         | X        | NF  | B             | 1    | WA  | A                                  |
| NA       | Eden-1        | 62.88    | 18.18     |           | X        | F   |               | 0    | AA  | A                                  |
| NA       | Eden-2        | 62.88    | 18.18     | x         | X        | F   |               | 0    | AA  | A                                  |
| NA       | Edi-0         | 56       | -3        | x         | X        | F   |               | 0    | AA  | B                                  |
| NA       | Eds-1         | 62.9     | 18.4      | x         | X        | F   |               | 1    | AA  | A                                  |
| NA       | Ei-2          | 50.3     | 6.3       | x         | X        | F   |               | 0    | AA  | A                                  |
| NA       | En-1          | 50       | 8.5       | x         | X        | NF  | B             | 0    | AA  | B                                  |
| NA       | Est-1         | 58.3     | 25.3      | x         | X        | NF  | L             | 0    | AA  | B                                  |
| NA       | Fab-2         | 63.02    | 18.32     | x         | X        | F   |               | 0    | AA  | A                                  |
| NA       | Fab-4         | 63.02    | 18.32     |           | X        | F   |               | 0    | AA  | A                                  |
| NA       | Fei-0         | 40.5     | -8.32     | x         | X        | NF  | O             | 0    | AA  | A                                  |
| NA       | Fjä1-1        | 56.06    | 14.29     | x         | X        |     |               | 0    | AA  | A                                  |
| NA       | Ga-0          | 50.3     | 8         | x         | X        | NF  | B             | 1    | AA  | A                                  |
| NA       | Gd-1          | 53.5     | 10.5      | x         | X        | NF  | L             | 0    | AA  | B                                  |
| NA       | Ge-0          | 46.5     | 6.08      | x         | X        | F   |               | 1    | AA  | A                                  |
| NA       | Got-22        | 51.53    | 9.94      | x         | X        | F   |               | 0    | AA  | B                                  |
| NA       | Got-7         | 51.53    | 9.94      | x         | X        | F   |               | 0    | AA  | B                                  |
| NA       | Gr-1          | 47       | 15.5      | x         | X        | NF  | B             | 0    | ND  | A                                  |
| NA       | Gu-0          | 50.3     | 8         | x         | X        | NF  | L             | 1    | AA  | B                                  |
| NA       | Gul1-2        | 56.3     | 16        | x         |          | F   |               | 0    | AA  | A                                  |

**Table 1. (continued)**

| Material | Name       | latitude | longitude | 2008-2009 | 216kSNPs | FRI | NF FRI allele | PHYC | FLC | FLC <sub>A</sub> -FLC <sub>B</sub> |
|----------|------------|----------|-----------|-----------|----------|-----|---------------|------|-----|------------------------------------|
| NA       | Gy-0       | 49       | 2         | x         | x        | NF  | P             | 0    | AA  | A                                  |
| NA       | H55        | 49       | 15        | x         | x        | NF  | L             | 1    | AA  | A                                  |
| NA       | Hi-0       | 52       | 5         | x         | x        | NF  | B             | -    | AA  | B                                  |
| NA       | Hod        | 48.8     | 17.1      | x         | x        | F   |               | 1    | AA  | B                                  |
| NA       | Hov2-1     | 56.1     | 13.74     | x         | x        |     |               | 0    | ND  | A                                  |
| NA       | Hov4-1     | 56.1     | 13.74     | x         | x        | F   |               | 1    | AA  | A                                  |
| NA       | Hovdala-2  | 56.1     | 13.74     | x         | x        | F   |               | 1    | AA  | B                                  |
| NA       | HR-10      | 51.41    | -0.64     | x         | x        | NF  | K             | -    | AA  | A                                  |
| NA       | HR-5       | 51.41    | -0.64     | x         | x        | NF  | K             | 0    | AA  | A                                  |
| NA       | Hs-0       | 52.24    | 9.44      | x         | x        | NF  | L             | 0    | AA  | B                                  |
| NA       | HSm        | 49.33    | 15.76     | x         | x        | F   |               | 0    | WA  | .                                  |
| NA       | In-0       | 47.5     | 11.5      | x         | x        | F   |               | 0    | AA  | B                                  |
| NA       | Is-0       | 50.5     | 7.5       | x         | x        | NF  | B             | 0    | AA  | B                                  |
| NA       | Jm-0       | 49       | 15        | x         | x        | NF  | B             | 0    | AA  | B                                  |
| NA       | Ka-0       | 47       | 14        | x         | x        | NF  | B             | 1    | AA  | A                                  |
| NA       | Kas-1      | 35       | 77        | x         |          | F   |               | 0    | AA  | B                                  |
| NA       | Kent       | 51.15    | 0.4       | x         | x        | NF  | B             | 1    | AA  | B                                  |
| NA       | Kin-0      | 44.46    | -85.37    | x         | x        | NF  | K             | 0    | AA  | A                                  |
| NA       | Kni-1      | 55.66    | 13.4      | x         | x        | F   |               | 0    | AA  | B                                  |
| NA       | Kno-10     | 41.28    | -86.62    | x         | x        | F   |               | 0    | AA  | A                                  |
| NA       | Kno-18     | 41.28    | -86.62    | x         | x        | F   |               | 0    | AA  | A                                  |
| NA       | Köln       | 51       | 7         | x         | x        | NF  | L             | 0    | AA  | B                                  |
| NA       | Kondara    | 38.48    | 68.49     | x         | x        | F   |               | -    | AA  | B                                  |
| NA       | Kulturen-1 | 55.71    | 13.2      | x         | x        |     |               | 1    | AA  | A                                  |
| NA       | Kz-1       | 49.5     | 73.1      | x         | x        | F   |               | -    | AA  | B                                  |
| NA       | Kz-13      | 49.5     | 73.1      | x         |          | F   |               | 1    | WA  | B                                  |
| NA       | Kz-9       | 49.5     | 73.1      | x         | x        | F   |               | 1    | ND  | B                                  |
| NA       | Lc-0       | 57       | -4        | x         | x        | NF  | O             | 1    | AA  | B                                  |
| NA       | Ler-1      | 47.98    | 10.87     | x         | x        | NF  | B             | 0    | WA  | A                                  |
| NA       | Liarum     | 55.95    | 13.85     | x         | x        | F   |               | 1    | AA  | A                                  |
| NA       | Lillö-1    | 56.15    | 15.78     | x         | x        | F   |               | 1    | AA  | A                                  |
| NA       | Lip-0      | 50       | 19.3      | x         | x        | F   |               | 1    | AA  | A                                  |
| NA       | Lis-1      | 56       | 14.7      | x         | x        | F   |               | 1    | WA  | B                                  |
| NA       | Lis-2      | 56       | 14.7      | x         | x        | F   |               | 1    | AA  | A                                  |
| NA       | Lisse      | 52.25    | 4.57      | x         | x        |     |               | 0    | AA  | .                                  |
| NA       | LL-0       | 41.59    | 2.49      | x         | x        | F   |               | 0    | ND  | A                                  |
| NA       | Lm-2       | 48       | 0.5       | x         | x        | NF  | B             | 0    | AA  | A                                  |
| NA       | Lom1-1     | 56.09    | 13.9      | x         | x        | NF  | B             | 0    | AA  | B                                  |
| NA       | Lov-1      | 62.8     | 18.08     | x         | x        | F   |               | 0    | ND  | A                                  |
| NA       | Lov-5      | 62.8     | 18.08     |           | x        | F   |               | 0    | ND  | .                                  |
| NA       | Lp2-2      | 49.38    | 16.81     | x         | x        | F   |               | 0    | WA  | A                                  |
| NA       | Lp2-6      | 49.38    | 16.81     | x         | x        | F   |               | 0    | WA  | A                                  |
| NA       | Lu-1       | 55.71    | 13.2      | x         | x        | F   |               | 1    | WA  | A                                  |
| NA       | Lund       | 55.71    | 13.2      | x         | x        | F   |               | 0    | AA  | B                                  |
| NA       | Lz-0       | 46       | 3.3       | x         | x        | NF  | B             | 0    | AA  | A                                  |
| NA       | Mir-0      | 44       | 12.37     | x         | x        | F   |               | 0    | AA  | A                                  |
| NA       | Mr-0       | 44.15    | 9.65      | x         | x        | F   |               | 0    | AA  | A                                  |
| NA       | Mrk-0      | 49       | 9.3       | x         | x        | NF  | B             | -    | AA  | B                                  |
| NA       | Ms-0       | 55.75    | 37.63     | x         | x        |     |               | 1    | AA  | B                                  |
| NA       | Mt-0       | 32.34    | 22.46     | x         | x        | NF  | L             | 1    | AA  | A                                  |
| NA       | Mz-0       | 50.3     | 8.3       | x         | x        | NF  | L             | 0    | AA  | B                                  |
| NA       | N6002      | 43.77    | 11.25     | x         | x        | F   |               | 0    | AA  | A                                  |
| NA       | N6034      | 48.61    | 2.31      | x         |          | F   |               | 0    | AA  | A                                  |
| NA       | N6041      | 50.07    | 8.53      | x         | x        |     |               | 0    | AA  | B                                  |
| NA       | N6187      | 47       | -122.2    | x         | x        | F   |               | 0    | AA  | A                                  |
| NA       | Na-1       | 47.5     | 1.5       | x         | x        | NF  | B             | 0    | AA  | B                                  |
| NA       | NC-6       | 35       | -79.18    | x         |          | F   |               | 0    | AA  | A                                  |
| NA       | Nd-1       | 50       | 10        | x         | x        | NF  | L             | 1    | AA  | A                                  |
| NA       | NFA-10     | 51.41    | -0.64     | x         | x        | NF  | S/T           | -    | AA  | A                                  |

**Table 1. (continued)**

| Material | Name        | latitude | longitude | 2008-2009 | 216kSNPs | FRI | NF FRI allele | PHYC | FLC | FLC <sub>A</sub> -FLC <sub>B</sub> |
|----------|-------------|----------|-----------|-----------|----------|-----|---------------|------|-----|------------------------------------|
| NA       | NFA-8       | 51.41    | -0.64     | x         | X        | NF  | K             | 0    | AA  | A                                  |
| NA       | Nok-3       | 52.24    | 4.45      | x         | X        | F   |               | 0    | AA  | B                                  |
| NA       | Nw-0        | 50.5     | 8.5       | x         | X        | NF  | L             | -    | AA  | B                                  |
| NA       | Nyl-2       | 62.96    | 18.28     | x         | X        | F   |               | 1    | AA  | A                                  |
| NA       | Omo-2-1     | 56.14    | 15.78     | x         | X        | F   |               | 1    | AA  | A                                  |
| NA       | Omo-2-3     | 56.14    | 15.78     | x         | X        | F   |               | 1    | AA  | B                                  |
| NA       | Ör-1        | 56.45    | 16.11     | x         | X        | F   |               | 1    | AA  | A                                  |
| NA       | Ost-0       | 60.25    | 18.37     | x         | X        | F   |               | 1    | AA  | A                                  |
| NA       | Oy-0        | 60.23    | 6.13      | x         | X        | NF  | L             | 0    | AA  | A                                  |
| NA       | Pa-1        | 38.07    | 13.22     | x         | X        | F   |               | 0    | AA  | A                                  |
| NA       | Per-1       | 58       | 56.32     | x         | X        | F   |               | 1    | WA  | A                                  |
| NA       | Petergof    | 59       | 29        | x         | X        | NF  | B             | 1    | AA  | B                                  |
| NA       | Pi-0        | 47.04    | 10.51     | x         |          | F   |               | 0    | AA  | B                                  |
| NA       | Pla-0       | 41.5     | 2.25      | x         | X        | F   |               | 0    | WA  | A                                  |
| NA       | Pna-10      | 42.09    | -86.33    | x         | X        | F   |               | 0    | AA  | A                                  |
| NA       | Pna-17      | 42.09    | -86.33    | x         | X        | NF  | Q             | 0    | AA  | B                                  |
| NA       | Pro-0       | 43.25    | -6        | x         | X        | NF  | N             | 0    | AA  | A                                  |
| NA       | Pu2-23      | 49.42    | 16.36     | x         | X        | F   |               | 0    | ND  | A                                  |
| NA       | Pu2-7       | 49.42    | 16.36     | x         | X        | F   |               | 0    | ND  | A                                  |
| NA       | Pu2-8       | 49.42    | 16.36     | x         | X        | F   |               | 0    | WA  | A                                  |
| NA       | Ra-0        | 46       | 3.3       | x         | X        | NF  | B             | 0    | AA  | A                                  |
| NA       | Rak-2       | 49       | 16        | x         | X        | NF  | B             | 0    | AA  | B                                  |
| NA       | Rd-0 CS1482 | 50.5     | 8.5       | x         | X        | NF  | L             | 0    | AA  | B                                  |
| NA       | Rd-0 CS1483 | 50.5     | 8.5       | x         | X        | NF  | L             | 0    | AA  | B                                  |
| NA       | Ren-1       | 48.5     | -1.41     | x         | X        | NF  |               | 0    | AA  | A                                  |
| NA       | Ren-11      | 48.5     | -1.41     | x         | X        | NF  | F             | 0    | AA  | A                                  |
| NA       | Rev-1       | 55.7     | 13.4      | x         | X        | F   |               | 0    | AA  | B                                  |
| NA       | Rmx-A02     | 42.04    | -86.51    | x         | X        | F   |               | 0    | AA  | .                                  |
| NA       | Rmx-A180    | 42.04    | -86.51    | x         | X        | NF  | O             | 0    | ND  | .                                  |
| NA       | RRS-10      | 41.56    | -86.43    | x         | X        | F   |               | 0    | AA  | A                                  |
| NA       | RRS-7       | 41.56    | -86.43    | x         | X        | NF  | B             | 0    | AA  | A                                  |
| NA       | Rsch-4      | 56.3     | 34        | x         | X        | NF  | B             | 1    | AA  | B                                  |
| NA       | Rubezhnoe-1 | 49       | 38.28     | x         | X        | F   |               | 1    | AA  | B                                  |
| NA       | San-2       | 56.07    | 13.74     | x         | X        | F   |               | 1    | AA  | B                                  |
| NA       | Sanna-2     | 62.69    | 18        | x         | X        | NF  | J             | 0    | WA  | A                                  |
| NA       | Santa Clara | 37.21    | -121.16   | x         |          | NF  | B             | 1    | AA  | A                                  |
| NA       | Sap-0       | 49.49    | 14.24     | x         | X        | F   |               | 1    | WA  | A                                  |
| NA       | Sav-0       | 49.18    | 15.88     | x         | X        |     |               | 1    | WA  | A                                  |
| NA       | Se-0        | 38.33    | -3.53     | x         | X        | F   |               | 0    | ND  | A                                  |
| NA       | Sf-1        | 41.78    | 3.03      | x         |          | F   |               | 0    | WA  | A                                  |
| NA       | Shahdara    | 38.35    | 68.48     | x         | X        | F   |               | -    | WA  | B                                  |
| NA       | Sorbo       | 38.35    | 68.48     | x         | X        | F   |               | -    | AA  | B                                  |
| NA       | Spr-1-2     | 56.3     | 16        | x         | X        | F   |               | 1    | AA  | A                                  |
| NA       | Spr-1-6     | 56.3     | 16        | x         | X        | F   |               | 1    | AA  | A                                  |
| NA       | Sq-1        | 51.41    | -0.64     | x         | X        | NF  | S/T           | 0    | AA  | A                                  |
| NA       | Sq-8        | 51.41    | -0.64     | x         | X        | NF  | L             | 0    | AA  | B                                  |
| NA       | Sr:5        | 58.9     | 11.2      | x         | X        | F   |               | 0    | WA  | A                                  |
| NA       | St-0        | 59       | 18        | x         | X        | F   |               | 0    | AA  | A                                  |
| NA       | Stu1-1      | 56.4     | 16.11     | x         |          | F   |               | 1    | AA  | A                                  |
| NA       | Stw-0       | 52       | 36        | x         | X        | F   |               | 1    | WA  | A                                  |
| NA       | Ta-0        | 49.5     | 14.5      | x         | X        | F   |               | 1    | WA  | A                                  |
| NA       | Tamm-2      | 60       | 23.5      | x         | X        | F   |               | 1    | AA  | A                                  |
| NA       | Tamm-27     | 60       | 23.5      | x         | X        | F   |               | 1    | AA  | A                                  |
| NA       | Tottarp-2   | 55.95    | 13.85     | x         | X        | F   |               | 1    | AA  | A                                  |
| NA       | Ts-1        | 41.72    | 2.93      | x         | X        | F   |               | 0    | ND  | A                                  |
| NA       | Ts-5        | 41.72    | 2.93      | x         | X        | F   |               | 0    | AA  | A                                  |
| NA       | Tsu-1       | 34.43    | 136.31    | x         | X        | NF  | B             | -    | AA  | B                                  |
| NA       | Tu-0        | 45       | 7.5       | x         | X        | NF  | B             | -    | AA  | B                                  |
| NA       | Ull-2-3     | 56.06    | 13.97     | x         | X        | NF  | M             | 0    | ND  | .                                  |

**Table 1. (continued)**

| Material | Name       | latitude | longitude | 2008-2009 | 216kSNPs | FRI | NF FRI allele | PHYC | FLC | FLC <sub>A</sub> -FLC <sub>B</sub> |
|----------|------------|----------|-----------|-----------|----------|-----|---------------|------|-----|------------------------------------|
| NA       | UII-2-5    | 56.06    | 13.97     | x         | x        | F   |               | -    | AA  | A                                  |
| NA       | UII1-1     | 56.06    | 13.97     | x         | x        |     |               | 1    | AA  | B                                  |
| NA       | Uod-1      | 48.3     | 14.45     | x         | x        | NF  | B             | 0    | AA  | A                                  |
| NA       | Uod-2      | 48.3     | 14.45     | x         |          |     |               | 1    | AA  | A                                  |
| NA       | Uod-7      | 48.3     | 14.45     | x         | x        | F   |               | 0    | AA  | A                                  |
| NA       | Van-0      | 49.3     | -123      | x         | x        | F   |               | 1    | AA  | A                                  |
| NA       | Var-2-1    | 55.58    | 14.33     | x         | x        | F   |               | -    | AA  | A                                  |
| NA       | Var-2-6    | 55.58    | 14.33     | x         | x        | F   |               | -    | AA  | A                                  |
| NA       | Västervik  | 57.75    | 16.63     | x         | x        |     |               | -    | AA  | A                                  |
| NA       | Vimmerby   | 57.7     | 15.8      | x         | x        | F   |               | -    | AA  | B                                  |
| NA       | Vinslöv    | 56.1     | 13.92     | x         | x        |     |               | 0    | AA  | B                                  |
| NA       | Wa-1       | 52.3     | 21        | x         | x        | F   |               | 1    | AA  | B                                  |
| NA       | Wei-0      | 47.25    | 8.26      | x         | x        | NF  | B             | 0    | AA  | A                                  |
| NA       | Wil-1      | 54.68    | 25.32     | x         |          | F   |               | 1    | AA  | A                                  |
| NA       | Wil-1 Dean | 54.68    | 25.32     |           | x        | F   |               | 1    | AA  | A                                  |
| NA       | Ws-0       | 52.3     | 30        | x         | x        | F   |               | 1    | AA  | A                                  |
| NA       | Ws-2       | 52.3     | 30        | x         | x        | F   | L             | 1    | AA  | B                                  |
| NA       | Wt-5       | 52.3     | 9.3       | x         | x        | NF  | B             | 0    | AA  | B                                  |
| NA       | Yo-0       | 37.45    | -119.35   | x         | x        | F   |               | 0    | AA  | A                                  |
| NA       | Zdr-1      | 49.39    | 16.25     | x         | x        | NF  | B             | 1    | ND  | A                                  |
| NA       | Zdr-6      | 49.39    | 16.25     | x         | x        | F   |               | 1    | WA  | A                                  |
| Parent   | Bay-0      | 49       | 11        |           | x        | NF  | B             | 1    | AA  | B                                  |
| Parent   | Bla-1      | 41.68    | 2.8       |           | x        | F   |               | 0    | AA  | A                                  |
| Parent   | Blh-1      | 48       | 19        |           | x        | F   |               | 1    | AA  | A                                  |
| Parent   | Bur-0      | 54.1     | -6.2      |           | x        | F   |               | 0    | AA  | A                                  |
| Parent   | Can-0      | 29.21    | -13.48    |           | x        | F   |               | 0    | AA  | A                                  |
| Parent   | Col-0      | 38.3     | -92.3     |           | x        | NF  | L             | 1    | AA  | A                                  |
| Parent   | Ct-1       | 37.3     | 15        |           | x        | NF  | B             | 0    | AA  | B                                  |
| Parent   | Cvi-0      | 15.11    | -23.62    |           | x        | NF  | I             | 0    | AA  | A                                  |
| Parent   | Ge-0       | 46.5     | 6.08      |           | x        | F   |               | 1    | AA  | A                                  |
| Parent   | Nok-1      | 52.24    | 4.45      |           | x        | F   |               | 0    | AA  | B                                  |
| Parent   | Ri-0       | 49.1     | -123      |           | x        | NF  |               | 0    | AA  | A                                  |
| Parent   | Shahdara   | 38.35    | 68.48     |           | x        | F   |               | -    | WA  | B                                  |
| Parent   | Tsu-0      | 34.43    | 136.31    |           | x        | NF  | B             | -    | AA  | B                                  |
| Parent   | Yo-0       | 37.45    | -119.35   |           | x        | F   |               | 0    | AA  | A                                  |

Plant material: NA = natural worldwide accession, Parent = parental lines of the 13 RIL families.

2008-2009: natural accessions phenotyped during the 2008-2009 field experiment.

216kSNPs: natural accessions genotyped for 216,509 SNP markers (Atwell *et al.* 2010).

FRI: functionality of the *FRIGIDA* gene according to Shindo *et al.* (2006). NF = non-functional, F = functional.

NF FRI allele: loss-of-function alleles (Shindo *et al.* 2006).

PHYC: promoter indel upstream of the start codon of PHYTOCHROME C (Balasubramanian *et al.* 2006). 0, Ler haplotype; 1, Col haplotype.

FLC: functionality of the *FLC* gene. AA = active allele, WA = weak or non-functional allele, ND = not defined (*i.e.* the presence/absence of transposon insertions could not be determined).

FLC<sub>A</sub>-FLC<sub>B</sub>: major *FLC* haplogroups (Caicedo *et al.* 2004).

**Table 2.** Effect of *Arabidopsis thaliana* plant genotype on flowering time scored in the field experiment: natural accessions, parental lines and RILs.

| group                             | family     | cross       | Source         | Type III SS | df       | MS        | F-ratio | P      |
|-----------------------------------|------------|-------------|----------------|-------------|----------|-----------|---------|--------|
| Group 1:<br>Natural<br>Accessions |            |             | Block          | 1.56E+04    | 2        | 7812.60   | 22.53   | 0.0000 |
|                                   |            |             | Genotype       | 2.35E+06    | 196      | 12008.63  | 34.64   | 0.0000 |
|                                   |            |             | Cov(Lov5)      | 1.41E+03    | 1        | 1405.19   | 4.05    | 0.0444 |
|                                   |            |             | Cov(Bg2)       | 1.73E+04    | 1        | 17271.86  | 49.82   | 0.0000 |
|                                   |            |             | Error          | 2.94E+05    | 848      | 346.70    |         |        |
| Group 3:<br>Parental<br>lines     |            |             | Block          | 4.25E+03    | 2        | 2126.258  | 10.325  | 0.0000 |
|                                   |            |             | Genotype       | 8.19E+05    | 13       | 62967.006 | 305.769 | 0.0000 |
|                                   |            |             | Block*Genotype | 5.22E+02    | 1        | 522.282   | 2.536   | 0.113  |
|                                   |            |             | Cov(Lov5)      | 6.96E+03    | 1        | 6958.25   | 33.789  | 0.0000 |
|                                   |            |             | Cov(Bg2)       | 1.28E+04    | 26       | 492.984   | 2.394   | 0.0000 |
|                                   |            |             | Error          | 4.61E+04    | 224      | 205.93    |         |        |
| Groupe 2: RIL families            | 2RV        | Col-0XBla-1 | Block          | 1.35E+04    | 2        | 6738.38   | 8.52    | 0.0002 |
|                                   |            |             | Genotype       | 1.61E+06    | 239      | 6748.71   | 8.54    | 0.0000 |
|                                   |            |             | Cov(Lov5)      | 3.02E+03    | 1        | 3022.89   | 3.82    | 0.0514 |
|                                   |            |             | Cov(Bg2)       | 4.73E+03    | 1        | 4734.73   | 5.99    | 0.0149 |
|                                   |            |             | Error          | 2.66E+05    | 337      | 790.62    |         |        |
|                                   | 3RV        | Col-0XNok-1 | Block          | 1.50E+04    | 2        | 7516.28   | 11.24   | 0.0000 |
|                                   |            |             | Genotype       | 1.16E+06    | 273      | 4261.84   | 6.37    | 0.0000 |
|                                   |            |             | Cov(Lov5)      | 5.39E+00    | 1        | 5.39      | 0.01    | 0.9285 |
|                                   |            |             | Cov(Bg2)       | 2.02E+04    | 1        | 20174.05  | 30.18   | 0.0000 |
|                                   |            |             | Error          | 2.92E+05    | 437      | 668.54    |         |        |
|                                   | 4RV        | Col-0XNok-1 | Block          | 1.50E+04    | 2        | 7481.73   | 11.52   | 0.0000 |
|                                   |            |             | Genotype       | 6.95E+05    | 221      | 3145.66   | 4.84    | 0.0000 |
|                                   |            |             | Cov(Lov5)      | 2.86E+01    | 1        | 28.60     | 0.04    | 0.8339 |
|                                   |            |             | Cov(Bg2)       | 4.14E+03    | 1        | 4137.75   | 6.37    | 0.0120 |
|                                   |            |             | Error          | 2.45E+05    | 378      | 649.41    |         |        |
|                                   | 6RV        | Col-0XRi-0  | Block          | 3.71E+03    | 2        | 1855.37   | 2.95    | 0.0535 |
|                                   |            |             | Genotype       | 6.03E+05    | 283      | 2132.08   | 3.38    | 0.0000 |
|                                   |            |             | Cov(Lov5)      | 1.39E+04    | 1        | 13862.23  | 22.01   | 0.0000 |
|                                   |            |             | Cov(Bg2)       | 9.57E+03    | 1        | 9573.90   | 15.20   | 0.0001 |
|                                   |            |             | Error          | 3.19E+05    | 507      | 629.92    |         |        |
|                                   | 7RV        | Col-0XCt-1  | Block          | 2.21E+04    | 2        | 11067.16  | 18.40   | 0.0000 |
|                                   |            |             | Genotype       | 8.39E+05    | 375      | 2236.03   | 3.72    | 0.0000 |
|                                   |            |             | Cov(Lov5)      | 2.97E+03    | 1        | 2966.70   | 4.93    | 0.0267 |
|                                   |            |             | Cov(Bg2)       | 1.52E+04    | 1        | 15184.65  | 25.24   | 0.0000 |
|                                   |            |             | Error          | 3.96E+05    | 659      | 601.61    |         |        |
|                                   | 8RV        | Col-0XCvi-0 | Block          | 2.02E+04    | 2        | 10110.44  | 12.39   | 0.0000 |
|                                   |            |             | Genotype       | 4.80E+06    | 365      | 13152.60  | 16.12   | 0.0000 |
|                                   |            |             | Cov(Lov5)      | 4.39E+03    | 1        | 4386.39   | 5.37    | 0.0207 |
|                                   |            |             | Cov(Bg2)       | 1.06E+04    | 1        | 10551.64  | 12.93   | 0.0003 |
|                                   |            |             | Error          | 5.56E+05    | 681      | 816.08    |         |        |
| 13RV                              | Col-0XSha  | Block       | 1.76E+04       | 2           | 8808.97  | 8.59      | 0.0002  |        |
|                                   |            | Genotype    | 2.39E+06       | 339         | 7052.95  | 6.88      | 0.0000  |        |
|                                   |            | Cov(Lov5)   | 3.48E+02       | 1           | 347.75   | 0.34      | 0.5605  |        |
|                                   |            | Cov(Bg2)    | 1.34E+04       | 1           | 13370.07 | 13.04     | 0.0003  |        |
|                                   |            | Error       | 5.90E+05       | 576         | 1024.99  |           |         |        |
| 17RV                              | Col-0XGe-0 | Block       | 1.16E+04       | 2           | 5793.78  | 21.20     | 0.0000  |        |
|                                   |            | Genotype    | 3.82E+05       | 337         | 1133.10  | 4.15      | 0.0000  |        |
|                                   |            | Cov(Lov5)   | 2.03E+03       | 1           | 2031.31  | 7.43      | 0.0066  |        |
|                                   |            | Cov(Bg2)    | 1.94E+04       | 1           | 19427.93 | 71.09     | 0.0000  |        |
|                                   |            | Error       | 1.67E+05       | 611         | 273.29   |           |         |        |

**Table 2. (continued)**

| group                 | family    | cross       | Source    | Type III SS | df       | MS       | F-ratio | <i>P</i> |
|-----------------------|-----------|-------------|-----------|-------------|----------|----------|---------|----------|
| Group 2: RIL families | 19RV      | Col-0XCan-0 | Block     | 1.99E+04    | 2        | 9935.25  | 16.14   | 0.0000   |
|                       |           |             | Genotype  | 1.62E+06    | 370      | 4377.71  | 7.11    | 0.0000   |
|                       |           |             | Cov(Lov5) | 1.39E+04    | 1        | 13943.94 | 22.66   | 0.0000   |
|                       |           |             | Cov(Bg2)  | 9.97E+03    | 1        | 9969.18  | 16.20   | 0.0001   |
|                       |           |             | Error     | 4.12E+05    | 670      | 615.40   |         |          |
|                       | 20RV      | Col-0XBur-0 | Block     | 1.83E+04    | 2        | 9170.15  | 15.99   | 0.0000   |
|                       |           |             | Genotype  | 1.27E+06    | 340      | 3749.11  | 6.54    | 0.0000   |
|                       |           |             | Cov(Lov5) | 3.13E+03    | 1        | 3130.65  | 5.46    | 0.0198   |
|                       |           |             | Cov(Bg2)  | 1.00E+04    | 1        | 10037.27 | 17.51   | 0.0000   |
|                       |           |             | Error     | 3.24E+05    | 565      | 573.33   |         |          |
|                       | 21RV      | Col-0XBih-1 | Block     | 1.10E+04    | 2        | 5499.05  | 6.92    | 0.0011   |
|                       |           |             | Genotype  | 1.07E+06    | 310      | 3460.03  | 4.36    | 0.0000   |
|                       |           |             | Cov(Lov5) | 1.07E+04    | 1        | 10721.80 | 13.50   | 0.0003   |
|                       |           |             | Cov(Bg2)  | 2.47E+04    | 1        | 24699.44 | 31.09   | 0.0000   |
|                       |           |             | Error     | 4.30E+05    | 541      | 794.36   |         |          |
|                       | 23RV      | Col-0XYo-0  | Block     | 3.18E+04    | 2        | 15921.56 | 38.39   | 0.0000   |
|                       |           |             | Genotype  | 9.06E+05    | 455      | 1991.71  | 4.80    | 0.0000   |
|                       |           |             | Cov(Lov5) | 9.43E+03    | 1        | 9427.23  | 22.73   | 0.0000   |
|                       |           |             | Cov(Bg2)  | 1.61E+04    | 1        | 16134.93 | 38.90   | 0.0000   |
|                       |           |             | Error     | 3.46E+05    | 834      | 414.76   |         |          |
| 33RV                  | Bay-0XSha | Block       | 2.41E+04  | 2           | 12046.49 | 20.50    | 0.0000  |          |
|                       |           | Genotype    | 1.33E+06  | 406         | 3267.72  | 5.56     | 0.0000  |          |
|                       |           | Cov(Lov5)   | 3.55E+03  | 1           | 3548.45  | 6.04     | 0.0142  |          |
|                       |           | Cov(Bg2)    | 9.55E+03  | 1           | 9549.23  | 16.25    | 0.0001  |          |
|                       |           | Error       | 4.15E+05  | 706         | 587.54   |          |         |          |

**Table 3.** Additive QTLs for flowering time scored in the field experiment.

| RIL family | QTL  | interval          | position | range       | A        | SE     | P-Value | h <sup>2</sup> (a) |
|------------|------|-------------------|----------|-------------|----------|--------|---------|--------------------|
| 2RV        | 1-18 | c1_28454-c1_29898 | 103.6    | 101.0-105.6 | 25.1383  | 2.3145 | <0.0001 | 0.2447             |
|            | 3-12 | c3_19628-c3_20729 | 69.6     | 63.8-76.1   | -11.0985 | 2.2734 | <0.0001 | 0.0387             |
|            | 4-1  | c4_00042-c4_02133 | 1.3      | 0.0-5.6     | -21.1668 | 2.2905 | <0.0001 | 0.1307             |
|            | 5-15 | c5_24997-c5_26671 | 90.3     | 87.8-92.1   | 27.5738  | 2.3353 | <0.0001 | 0.1855             |
| 3RV        | 1-12 | c1_18368-c1_20384 | 55.1     | 45.6-61.1   | 10.168   | 1.7252 | <0.0001 | 0.0282             |
|            | 2-13 | c2_17606-c2_18753 | 55.7     | 53.2-58.1   | 8.8091   | 1.6306 | <0.0001 | 0.0945             |
|            | 4-4  | c4_04877-c4_05850 | 13.1     | 0.5-19.2    | 6.9853   | 1.711  | <0.0001 | 0.0076             |
|            | 5-3  | c5_02900-c5_04011 | 11.7     | 10.5-13.2   | 32.0854  | 1.6761 | <0.0001 | 0.455              |
| 4RV        | 2-8  | c2_10250-c2_12435 | 39.2     | 34.9-46.2   | 11.8479  | 1.79   | <0.0001 | 0.0939             |
|            | 3-11 | c3_15117-c3_17552 | 51.2     | 44.3-57.1   | -7.574   | 1.6349 | <0.0001 | 0.0351             |
|            | 4-10 | c4_11878-c4_13171 | 43.2     | 41.3-45.1   | -18.7506 | 1.7151 | <0.0001 | 0.3093             |
| 6RV        | 5-4  | c5_04011-c5_05319 | 14.4     | 12.4-15.6   | 11.2515  | 1.4196 | <0.0001 | 0.1267             |
|            | 5-17 | c5_24997-c5_26321 | 89       | 86.9-90.8   | 13.5894  | 1.4729 | <0.0001 | 0.2026             |
| 7RV        | 3-13 | c3_20729-c3_22147 | 71.5     | 66.6-74.1   | 4.9904   | 1.0901 | <0.0001 | 0.0365             |
|            | 4-6  | c4_05850-c4_06923 | 20.7     | 14.3-25.1   | 4.3549   | 1.0927 | <0.0001 | 0.035              |
|            | 4-10 | c4_08930-c4_10609 | 44.9     | 38.6-51.3   | 4.6542   | 1.1052 | <0.0001 | 0.0025             |
|            | 5-4  | c5_04011-c5_05319 | 13.7     | 12.0-15.1   | 16.3352  | 1.0815 | <0.0001 | 0.3104             |
|            | 5-20 | c5_24997-c5_26671 | 89.4     | 85.3-93.3   | 8.9199   | 1.1185 | <0.0001 | 0.0781             |
| 8RV        | 1-1  | c1_00593-c1_02212 | 1.5      | 0.3-2.7     | 48.0923  | 2.0737 | <0.0001 | 0.4562             |
|            | 1-23 | c1_28667-c1_29898 | 135.8    | 130.2-137.9 | 13.0275  | 2.1161 | <0.0001 | 0.0186             |
|            | 4-12 | c4_11878-c4_13171 | 57.9     | 52.7-61.5   | 13.1663  | 2.0577 | <0.0001 | 0.0313             |
|            | 5-3  | c5_02900-c5_04011 | 17.3     | 14.0-22.5   | -12.18   | 2.0308 | <0.0001 | 0.0495             |
|            | 5-7  | c5_07442-c5_08563 | 33.1     | 30.5-35.4   | -9.8079  | 2.049  | <0.0001 | 0.0201             |
|            | 5-18 | c5_24997-c5_26671 | 111.1    | 108.3-112.7 | 18.4554  | 2.0853 | <0.0001 | 0.077              |
| 13RV       | 1-20 | c1_28454-c1_29898 | 93.2     | 89.9-96.2   | 13.0769  | 1.9835 | <0.0001 | 0.0404             |
|            | 2-7  | c2_07650-c2_10250 | 27.1     | 22.8-31.4   | -16.8388 | 2.105  | <0.0001 | 0.0334             |
|            | 2-14 | c2_17606-c2_18753 | 61.2     | 58.3-61.2   | 14.3015  | 1.9134 | <0.0001 | 0.1001             |
|            | 3-6  | c3_05141-c3_06631 | 8        | 1.4-11.0    | 13.299   | 1.9551 | <0.0001 | 0.0473             |
|            | 4-11 | c4_11878-c4_13171 | 50.6     | 42.9-53.7   | -12.6146 | 2.0365 | <0.0001 | 0.0176             |
|            | 5-3  | c5_02900-c5_04011 | 10.3     | 8.1-11.9    | 21.9281  | 1.9517 | <0.0001 | 0.145              |
|            | 5-17 | c5_24997-c5_26671 | 83       | 80.0-85.4   | 26.7251  | 2.0109 | <0.0001 | 0.2064             |
| 17RV       | 2-12 | c2_17606-c2_18753 | 62.6     | 59.7-64.4   | 5.075    | 0.8114 | <0.0001 | 0.0669             |
|            | 3-2  | c3_01901-c3_02968 | 3.8      | 1.5-6.3     | 5.7749   | 0.7789 | <0.0001 | 0.0766             |
|            | 4-1  | c4_00641-c4_02133 | 2        | 0.0-4.6     | -7.603   | 0.8169 | <0.0001 | 0.0691             |
|            | 5-5  | c5_05319-c5_06820 | 26.2     | 24.3-32.0   | -9.0636  | 0.7996 | <0.0001 | 0.1341             |
|            | 5-18 | c5_24997-c5_26321 | 94.8     | 92.7-94.8   | 8.6772   | 0.7703 | <0.0001 | 0.1777             |
| 19RV       | 1-19 | c1_26993-c1_28454 | 98.6     | 96.8-102.7  | 10.7099  | 1.2869 | <0.0001 | 0.0957             |
|            | 4-1  | c4_00641-c4_02133 | 0.1      | 0.0-0.7     | -13.8883 | 1.2662 | <0.0001 | 0.0308             |
|            | 4-10 | c4_10609-c4_11878 | 27.4     | 25.6-31.1   | 21.6857  | 1.312  | <0.0001 | 0.2464             |
|            | 5-3  | c5_02900-c5_04011 | 10.7     | 7.4-16.9    | -4.1901  | 1.3035 | <0.0001 | 0.0181             |
|            | 5-17 | c5_24997-c5_26671 | 90.9     | 89.2-92.7   | 19.4886  | 1.3855 | <0.0001 | 0.2085             |
| 20RV       | 1-4  | c1_04176-c1_05593 | 8.3      | 0.0-11.8    | -6.3288  | 1.4724 | <0.0001 | 0.0551             |
|            | 1-10 | c1_13869-c1_15634 | 41.9     | 40.3-45.9   | -15.1421 | 1.4661 | <0.0001 | 0.0816             |
|            | 4-10 | c4_10609-c4_11878 | 37.6     | 35.3-40.0   | -13.2772 | 1.5125 | <0.0001 | 0.0779             |
|            | 5-4  | c5_04011-c5_05319 | 10.7     | 9.6-14.9    | 21.8483  | 1.5027 | <0.0001 | 0.268              |
|            | 5-17 | c5_22415-c5_23116 | 74.3     | 70.9-76.8   | -10.7022 | 1.4991 | <0.0001 | 0.0661             |

**Table 3. (continued)**

| RIL family | QTL  | interval              | position | range     | A        | SE     | P-Value | h <sup>2</sup> (a) |
|------------|------|-----------------------|----------|-----------|----------|--------|---------|--------------------|
| 21RV       | 3-13 | c3_20729-c3_22147     | 67.5     | 61.1-70.1 | 5.9157   | 1.8354 | <0.0001 | 0.0414             |
|            | 4-8  | c4_08930-c4_11878     | 50.6     | 44.9-53.8 | 11.161   | 1.9054 | <0.0001 | 0.0809             |
|            | 5-2  | c5_01587-c5_02900     | 9.7      | 7.3-13.7  | 13.6697  | 1.91   | <0.0001 | 0.1165             |
| 23RV       | 3-1  | c3_00885-c3_01901     | 3        | 0.0-7.7   | 4.5576   | 0.8096 | <0.0001 | 0.0218             |
|            | 4-1  | c4_00641-c4_02341     | 0        | 0.0-1.1   | -8.1466  | 0.7852 | <0.0001 | 0.1031             |
|            | 4-7  | c4_08930-c4_10609     | 36.7     | 32.7-42.4 | -4.8106  | 0.8233 | <0.0001 | 0.0319             |
|            | 5-6  | c5_06820-c5_07442     | 21.5     | 20.7-23.2 | -13.0906 | 0.797  | <0.0001 | 0.1807             |
|            | 5-18 | c5_24997-c5_26444     | 77.9     | 76.6-79.1 | 14.8201  | 0.8353 | <0.0001 | 0.2702             |
| 33RV       | 1-17 | MSAT127088-MSAT1.5    | 89.1     | 86.0-91.0 | -12.7732 | 1.3187 | <0.0001 | 0.0662             |
|            | 2-4  | IND628-MSAT2.36       | 21.3     | 16.5-26.3 | 9.3802   | 1.4237 | <0.0001 | 0.0481             |
|            | 2-10 | MSAT2.10-MSAT2.22     | 64.4     | 60.4-64.4 | -6.6995  | 1.2404 | <0.0001 | 0.0577             |
|            | 3-8  | MSAT3.21-MSAT318406   | 50.3     | 40.0-55.9 | 7.4047   | 1.3091 | <0.0001 | 0.0333             |
|            | 4-1  | MSAT4.39-MSAT4.8      | 1        | 0.0-4.2   | 11.5621  | 1.2665 | <0.0001 | 0.1108             |
|            | 4-6  | MSAT4.15-CIW7         | 43.7     | 40.3-45.9 | 16.1257  | 1.3021 | <0.0001 | 0.0801             |
|            | 5-11 | MSAT518662-MSAT520037 | 67.3     | 63.4-67.3 | 5.0839   | 1.2459 | <0.0001 | 0.0003             |
|            | 5-16 | MSAT5.19-K9I9         | 84.9     | 83.2-86.9 | -16.2971 | 1.2404 | <0.0001 | 0.1271             |

Each QTL is designated by the relevant chromosome and the marker interval. For example, a QTL named 3-13 means that the QTL is located at the 13<sup>th</sup> marker interval of the 3<sup>rd</sup> chromosome.

Interval: the flanking markers of the QTL.

Position expressed in cM: the distance between the QTL and the first marker of the relevant chromosome.

RIL family: Denomination of the RIL families using the CRB codes (see Table 11 in Dataset S1 for correspondence).

Range expressed in cM: the support interval of the QTL position.

A: the estimated additive effect of the Col-0 allele for all RIL families, except for RIL family 33RV, for which the estimated additive effect corresponds to the Shahdara allele.

SE: standard error of the estimated QTL effect.

P-Value: p-value of the predicted QTL effect.

h<sup>2</sup>(a): heritability of the additive effect.



**Table 4.** Epistatic QTLs for flowering time scored in the field experiment.

|      | QTL <sub>i</sub>       | interval <sub>i</sub> | position <sub>i</sub> | range <sub>i</sub>  | QTL <sub>j</sub> | interval <sub>j</sub> | position <sub>j</sub> | range <sub>j</sub> | AA     | SE   | P-Value |
|------|------------------------|-----------------------|-----------------------|---------------------|------------------|-----------------------|-----------------------|--------------------|--------|------|---------|
| 2RV  | 1-18                   | c1_28454-c1_29898     | 103.6                 | 101.0-105.6         | 5-15             | c5_24997-c5_26671     | 90.30                 | 87.8-92.1          | -10.12 | 2.49 | 0.00    |
|      | epistasis heritability | QTL <sub>i</sub>      | QTL <sub>j</sub>      | h <sup>2</sup> (aa) |                  |                       |                       |                    |        |      |         |
|      | 1-18                   |                       | 5-15                  | 0.0235              |                  |                       |                       |                    |        |      |         |
| 3RV  | 1-12                   | c1_18368-c1_20384     | 55.10                 | 45.6-61.1           | 5-3              | c5_02900-c5_04011     | 11.70                 | 10.5-13.2          | 9.59   | 1.79 | 0.00    |
|      | epistasis heritability | QTL <sub>i</sub>      | QTL <sub>j</sub>      | h <sup>2</sup> (aa) |                  |                       |                       |                    |        |      |         |
|      | 1-12                   |                       | 5-3                   | 0.04                |                  |                       |                       |                    |        |      |         |
| 4RV  | 4-1                    | c4_00641-c4_02133     | 0                     | 0.0-2.1             | 5-3              | c5_02900-c5_04011     | 14.10                 | 10.7-19.5          | 9.96   | 1.71 | 0.00    |
|      | epistasis heritability | QTL <sub>i</sub>      | QTL <sub>j</sub>      | h <sup>2</sup> (aa) |                  |                       |                       |                    |        |      |         |
|      | 4-1                    |                       | 5-3                   | 0.078               |                  |                       |                       |                    |        |      |         |
| 7RV  | 1-14                   | c1_20384-c1_23381     | 76.9                  | 73.5-80.9           | 5-4              | c5_04011-c5_05319     | 13.70                 | 12.0-15.1          | 7.20   | 1.19 | 0.00    |
|      | epistasis heritability | QTL <sub>i</sub>      | QTL <sub>j</sub>      | h <sup>2</sup> (aa) |                  |                       |                       |                    |        |      |         |
|      | 1-14                   |                       | 5-4                   | 0.0487              |                  |                       |                       |                    |        |      |         |
| 8RV  | 1-1                    | c1_00593-c1_02212     | 1.5                   | 0.3-2.7             | 5-7              | c5_07442-c5_08563     | 33.10                 | 30.5-35.4          | 9.47   | 2.17 | 0.00    |
|      | 1-1                    | c1_00593-c1_02212     | 1.5                   | 0.3-2.7             | 4-10             | c4_08930-c4_10609     | 47.90                 | 44.7-51.2          | 13.23  | 2.26 | 0.00    |
|      | epistasis heritability | QTL <sub>i</sub>      | QTL <sub>j</sub>      | h <sup>2</sup> (aa) |                  |                       |                       |                    |        |      |         |
|      | 1-1                    |                       | 5-7                   | 0.0091              |                  |                       |                       |                    |        |      |         |
|      | 1-1                    |                       | 4-10                  | 0.0404              |                  |                       |                       |                    |        |      |         |
|      | 1-1                    |                       | 4-12                  | 0.0009              |                  |                       |                       |                    |        |      |         |
| 13RV | 4-11                   | c4_11878-c4_13171     | 50.6                  | 42.9-53.7           | 5-17             | c5_24997-c5_26671     | 83.00                 | 80.0-85.4          | -7.54  | 2.17 | 0.00    |
|      | epistasis heritability | QTL <sub>i</sub>      | QTL <sub>j</sub>      | h <sup>2</sup> (aa) |                  |                       |                       |                    |        |      |         |
|      | 4-11                   |                       | 5-17                  | 0.0102              |                  |                       |                       |                    |        |      |         |

**Table 4. (continued)**

|      | QTL_i                  | interval_i            | position_i          | range_i    | QTL_j | interval_j        | position_j | range_j   | AA    | SE   | P-Value |  |
|------|------------------------|-----------------------|---------------------|------------|-------|-------------------|------------|-----------|-------|------|---------|--|
| 19RV | 1-19                   | c1_26993-c1_28454     | 98.6                | 96.8-102.7 | 4-1   | c4_00641-c4_02133 | 0.10       | 0.0-0.7   | 5.35  | 1.29 | 0.00    |  |
|      | 4-5                    | c4_05850-c4_06923     | 4.2                 | 0.8-7.3    | 5-3   | c5_02900-c5_04011 | 10.70      | 7.4-16.9  | -3.53 | 1.31 | 0.01    |  |
|      | epistasis heritability |                       |                     |            |       |                   |            |           |       |      |         |  |
|      | QTL_i                  | QTL_j                 | h <sup>2</sup> (aa) |            |       |                   |            |           |       |      |         |  |
|      | 1-19                   | 4-1                   | 0.0172              |            |       |                   |            |           |       |      |         |  |
|      | 4-1                    | 5-3                   | 0.0065              |            |       |                   |            |           |       |      |         |  |
| 21RV | 4-5                    | 5-3                   | 0.002               |            |       |                   |            |           |       |      |         |  |
|      | QTL_i                  | interval_i            | position_i          | range_i    | QTL_j | interval_j        | position_j | range_j   | AA    | SE   | P-Value |  |
|      | 4-1                    | c4_00012-c4_02133     | 5.4                 | 0.0-11.0   | 5-2   | c5_01587-c5_02900 | 9.70       | 7.3-13.7  | 7.49  | 2.20 | 0.00    |  |
|      | 4-4                    | c4_04877-c4_05850     | 17                  | 12.6-22.6  | 5-2   | c5_01587-c5_02900 | 9.70       | 7.3-13.7  | 5.25  | 2.07 | 0.01    |  |
|      | epistasis heritability |                       |                     |            |       |                   |            |           |       |      |         |  |
|      | QTL_i                  | QTL_j                 | h <sup>2</sup> (aa) |            |       |                   |            |           |       |      |         |  |
| 4-1  | 5-2                    | 0.0613                |                     |            |       |                   |            |           |       |      |         |  |
| 4-4  | 5-2                    | 0.0056                |                     |            |       |                   |            |           |       |      |         |  |
| 23RV | QTL_i                  | interval_i            | position_i          | range_i    | QTL_j | interval_j        | position_j | range_j   | AA    | SE   | P-Value |  |
|      | 4-1                    | c4_00641-c4_02341     | 0                   | 0.0-1.1    | 5-18  | c5_24997-c5_26444 | 77.90      | 76.6-79.1 | 3.42  | 0.84 | 0.00    |  |
|      | epistasis heritability |                       |                     |            |       |                   |            |           |       |      |         |  |
|      | QTL_i                  | QTL_j                 | h <sup>2</sup> (aa) |            |       |                   |            |           |       |      |         |  |
|      | 4-1                    | 5-18                  | 0.014               |            |       |                   |            |           |       |      |         |  |
| 33RV | QTL_i                  | interval_i            | position_i          | range_i    | QTL_j | interval_j        | position_j | range_j   | AA    | SE   | P-Value |  |
|      | 1-17                   | MSAT127088-MSAT1.5    | 89.1                | 86.0-91.0  | 5-16  | MSAT5.19-K919     | 84.90      | 83.2-86.9 | -5.55 | 1.33 | 0.00    |  |
|      | 5-11                   | MSAT518662-MSAT520037 | 67.3                | 63.4-67.3  | 5-16  | MSAT5.19-K919     | 84.90      | 83.2-86.9 | -5.70 | 1.26 | 0.00    |  |
|      | epistasis heritability |                       |                     |            |       |                   |            |           |       |      |         |  |
|      | QTL_i                  | QTL_j                 | h <sup>2</sup> (aa) |            |       |                   |            |           |       |      |         |  |
|      | 1-17                   | 5-16                  | 0.0177              |            |       |                   |            |           |       |      |         |  |
| 5-11 | 5-16                   | 0.0166                |                     |            |       |                   |            |           |       |      |         |  |

QTL\_i and QTL\_j are the 2 QTLs involved in epistatic interactions. AA: the estimated additive x additive effect of the Col-0 allele for all RIL families, except for RIL family 33RV, for which the estimated additive x additive effect corresponds to the Shahdara allele. h<sup>2</sup>(aa): heritability of the additive x additive effect. For other descriptors, see the legend of Table 3 in Dataset S1.

**Table 5.** Genotypes of near-isogenic lines validating additive QTLs found in the Bay-0 x Shahdara RIL family, following the heterogeneous inbred families (HIFs) strategy.

| Locus      | Chr | cM   | Mb    | HIF |     |     |     |     |     |    |     |     |     |     |     |    |     |    |     |
|------------|-----|------|-------|-----|-----|-----|-----|-----|-----|----|-----|-----|-----|-----|-----|----|-----|----|-----|
|            |     |      |       | 100 | 408 | 144 | 416 | 192 | 404 | 11 | 203 | 367 | 143 | 181 | 312 | 90 | 397 | 48 | 108 |
| MSAT100008 | 1   | 0    | 0.01  | A   | A   | A   | A   | B   | B   | A  | B   | A   | A   | B   | A   | B  | B   | B  | B   |
| T1G11      | 1   | 3.5  | 1.24  | B   | A   | A   | A   | A   | B   | A  | B   | A   | A   | B   | A   | B  | B   | B  | B   |
| F21M12     | 1   | 9.7  | 3.21  | B   | A   | A   | A   | A   | B   | A  | B   | A   | A   | B   | A   | B  | B   | B  | B   |
| IND4992    | 1   | 15.4 | 4.99  | B   | A   | A   | A   | A   | B   | A  | B   | A   | A   | B   | A   | B  | B   | B  | B   |
| IND6375    | 1   | 19   | 6.38  | B   | A   | A   | A   | A   | B   | B  | A   | A   | A   | B   | A   | B  | B   | B  | B   |
| MSAT1.10   | 1   | 21.6 | 7.30  | B   | A   | A   | A   | A   | B   | B  | A   | A   | A   | B   | A   | B  | A   | B  | B   |
| MSAT108193 | 1   | 26.6 | 8.19  | B   | A   | B   | A   | A   | B   | A  | A   | A   | A   | B   | A   | B  | C   | B  | A   |
| NGA248     | 1   | 32.4 | 9.89  | B   | A   | B   | A   | A   | B   | A  | A   | A   | A   | B   | A   | B  | C   | B  | A   |
| IND1136    | 1   | 38.7 | 11.36 | B   | A   | B   | A   | A   | B   | A  | A   | B   | A   | B   | A   | B  | C   | B  | A   |
| T27K12     | 1   | 49.1 | 15.93 | B   | B   | B   | B   | A   | B   | A  | A   | B   | A   | A   | A   | B  | A   | B  | B   |
| MSAT1.42   | 1   | 54.7 | 18.15 | B   | B   | B   | B   | A   | B   | A  | A   | B   | B   | A   | A   | D  | A   | B  | D   |
| NGA128     | 1   | 61.3 | 20.63 | B   | B   | B   | B   | A   | B   | A  | A   | B   | B   | A   | A   | A  | A   | B  | B   |
| IND2188    | 1   | 63.8 | 21.89 | B   | B   | B   | B   | A   | B   | A  | A   | B   | B   | A   | A   | A  | A   | B  | B   |
| dCAPsAPR2  | 1   | 66.1 | 22.98 | B   | B   | B   | B   | A   | B   | A  | A   | B   | B   | A   | A   | A  | A   | B  | B   |
| F5114      | 1   | 69.6 | 24.37 | B   | B   | B   | B   | A   | B   | A  | A   | B   | A   | B   | A   | A  | A   | B  | B   |
| MSAT1.13   | 1   | 76.3 | 25.83 | B   | B   | B   | B   | A   | B   | A  | A   | B   | A   | B   | B   | A  | A   | B  | B   |
| MSAT127088 | 1   | 82.7 | 27.09 | B   | B   | D   | B   | A   | B   | A  | A   | B   | A   | B   | B   | A  | A   | B  | B   |
| MSAT1.5    | 1   | 91.3 | 29.02 | C   | C   | B   | B   | A   | B   | A  | A   | B   | B   | A   | B   | A  | B   | A  | B   |
| MSAT2.5    | 2   | 0    | 0.21  | B   | B   | A   | A   | A   | B   | B  | B   | A   | B   | A   | B   | B  | B   | A  | B   |
| MSAT200897 | 2   | 7.9  | 0.90  | B   | B   | A   | A   | A   | B   | B  | B   | B   | A   | A   | B   | B  | B   | A  | B   |
| MSAT2.38   | 2   | 13   | 2.46  | B   | B   | A   | A   | A   | B   | B  | B   | B   | A   | B   | B   | B  | B   | A  | B   |
| IND628     | 2   | 14.8 | 6.28  | B   | B   | C   | A   | B   | B   | B  | B   | B   | A   | B   | B   | B  | B   | A  | B   |
| MSAT2.36   | 2   | 27.1 | 8.69  | B   | A   | C   | A   | B   | B   | B  | B   | B   | A   | B   | B   | B  | A   | A  | B   |
| MSAT2.41   | 2   | 35   | 11.10 | B   | A   | C   | A   | B   | B   | B  | A   | B   | A   | B   | B   | B  | A   | A  | B   |
| CZSOD2     | 2   | 38.1 | 11.95 | B   | A   | B   | A   | B   | B   | B  | A   | B   | A   | B   | B   | B  | A   | A  | B   |
| MSAT2.7    | 2   | 42.9 | 13.19 | B   | A   | C   | B   | B   | B   | B  | A   | B   | A   | B   | B   | B  | A   | A  | B   |
| IND216199  | 2   | 51.5 | 16.20 | B   | A   | B   | C   | B   | B   | B  | C   | B   | A   | B   | B   | B  | A   | A  | B   |
| MSAT2.10   | 2   | 57.9 | 18.02 | B   | A   | B   | C   | B   | B   | B  | A   | B   | A   | A   | B   | B  | A   | A  | B   |
| MSAT2.22   | 2   | 64.6 | 19.63 | B   | A   | B   | C   | B   | B   | B  | A   | B   | A   | A   | B   | B  | A   | B  | B   |
| NGA172     | 3   | 0    | 0.79  | A   | A   | B   | A   | B   | A   | B  | B   | B   | B   | A   | A   | B  | B   | A  | A   |
| MSAT3.99   | 3   | 3.2  | 1.51  | A   | A   | B   | A   | B   | A   | B  | B   | B   | B   | B   | A   | B  | B   | A  | A   |
| ATHCHIB2   | 3   | 6.6  | 3.96  | A   | A   | B   | B   | B   | A   | B  | B   | A   | B   | B   | A   | B  | B   | A  | A   |
| MSAT305754 | 3   | 7.9  | 5.75  | A   | A   | B   | B   | B   | A   | B  | B   | A   | B   | B   | A   | B  | B   | A  | A   |
| MSAT3.19   | 3   | 23.2 | 8.81  | B   | A   | A   | B   | A   | A   | B  | A   | A   | B   | B   | A   | B  | B   | A  | A   |
| MSAT3.117  | 3   | 28.8 | 9.86  | B   | A   | A   | A   | C   | B   | B  | A   | A   | A   | B   | A   | B  | B   | A  | A   |
| MSAT3.32   | 3   | 39.5 | 11.21 | B   | A   | A   | A   | C   | C   | A  | A   | B   | A   | A   | A   | B  | B   | A  | A   |
| MSAT3.21   | 3   | 48   | 17.28 | B   | B   | A   | A   | C   | C   | A  | A   | B   | A   | A   | A   | B  | B   | A  | A   |
| MSAT318406 | 3   | 53.3 | 18.41 | B   | B   | A   | A   | C   | C   | A  | A   | B   | A   | A   | A   | B  | D   | A  | A   |
| MSAT3.65   | 3   | 59   | 19.84 | B   | B   | A   | A   | B   | A   | A  | A   | B   | A   | A   | A   | B  | B   | A  | A   |
| MSAT3.18   | 3   | 64.1 | 21.39 | B   | B   | A   | A   | B   | A   | A  | A   | B   | A   | A   | A   | B  | A   | A  | A   |
| MSAT3.70   | 3   | 72.2 | 23.45 | A   | B   | A   | A   | B   | A   | A  | A   | A   | A   | A   | A   | B  | A   | A  | A   |
| MSAT4.39   | 4   | 0    | 0.09  | A   | A   | B   | B   | A   | A   | A  | C   | C   | C   | B   | B   | B  | A   | B  | B   |
| MSAT4.8    | 4   | 2    | 0.41  | A   | A   | B   | B   | A   | A   | A  | C   | C   | C   | C   | C   | B  | A   | B  | B   |
| MSAT4.43   | 4   | 10.7 | 2.58  | A   | A   | B   | B   | A   | A   | C  | A   | B   | C   | B   | C   | B  | B   | B  | B   |
| NGA8       | 4   | 15.8 | 5.63  | A   | A   | B   | B   | B   | A   | C  | A   | B   | C   | B   | C   | B  | B   | B  | A   |
| MSAT4.35   | 4   | 24.2 | 7.55  | A   | A   | B   | A   | B   | A   | C  | A   | B   | B   | B   | B   | A  | B   | B  | A   |
| MSAT4.15   | 4   | 33.5 | 9.36  | A   | A   | B   | A   | B   | A   | B  | A   | B   | A   | B   | B   | B  | B   | B  | B   |
| CIW7       | 4   | 45   | 11.52 | A   | A   | B   | A   | B   | A   | B  | A   | A   | A   | B   | B   | D  | B   | B  | B   |
| MSAT4.18   | 4   | 47   | 11.97 | A   | A   | B   | A   | B   | A   | B  | A   | A   | A   | B   | B   | C  | B   | B  | B   |
| MSAT4.9    | 4   | 55.6 | 15.79 | A   | A   | B   | A   | B   | A   | B  | A   | A   | A   | A   | B   | A  | B   | C  | B   |
| MSAT4.68   | 4   | 61.8 | 17.26 | A   | A   | B   | A   | B   | B   | B  | A   | A   | B   | A   | B   | A  | B   | C  | A   |
| MSAT4.37   | 4   | 69.1 | 18.34 | A   | A   | A   | A   | B   | B   | B  | A   | A   | B   | A   | B   | B  | B   | A  | B   |
| MSAT500027 | 5   | 0    | 0.03  | A   | B   | A   | B   | A   | B   | A  | A   | B   | A   | B   | B   | B  | A   | A  | B   |
| NGA225     | 5   | 8.8  | 1.51  | A   | B   | A   | B   | A   | B   | A  | A   | B   | A   | B   | B   | B  | A   | A  | B   |
| NGA249     | 5   | 12.1 | 2.77  | A   | B   | B   | B   | A   | B   | A  | A   | B   | A   | B   | B   | A  | A   | A  | B   |
| NGA151     | 5   | 17.7 | 4.67  | A   | A   | B   | B   | A   | B   | A  | A   | B   | A   | B   | B   | A  | A   | A  | B   |
| MSAT5.14   | 5   | 26.6 | 7.50  | A   | B   | B   | B   | A   | A   | A  | A   | B   | A   | A   | B   | A  | A   | A  | A   |

**Table 5. (continued)**

| Locus      | Chr | cM   | Mb    | HIF |     |     |     |     |     |    |     |     |     |     |     |    |     |    |     |   |
|------------|-----|------|-------|-----|-----|-----|-----|-----|-----|----|-----|-----|-----|-----|-----|----|-----|----|-----|---|
|            |     |      |       | 100 | 408 | 144 | 416 | 192 | 404 | 11 | 203 | 367 | 143 | 181 | 312 | 90 | 397 | 48 | 108 |   |
| NGA139     | 5   | 30.4 | 8.43  | B   | B   | B   | A   | A   | A   | A  | A   | B   | A   | A   | B   | A  | A   | A  | A   |   |
| MSAT512110 | 5   | 41.8 | 12.11 | B   | B   | B   | A   | A   | A   | B  | A   | B   | A   | A   | B   | A  | A   | A  | B   | A |
| MSAT5.22   | 5   | 45.4 | 13.96 | B   | B   | B   | A   | A   | B   | B  | A   | B   | A   | A   | B   | A  | A   | B  | A   | A |
| MSAT5.59   | 5   | 51.5 | 15.46 | B   | B   | B   | A   | A   | B   | B  | A   | B   | A   | A   | B   | A  | B   | B  | A   | A |
| MSAT5.9    | 5   | 57.8 | 17.25 | B   | B   | B   | A   | A   | B   | B  | A   | B   | A   | A   | B   | A  | A   | B  | A   | A |
| MSAT518662 | 5   | 62.3 | 18.66 | B   | B   | B   | A   | A   | B   | A  | A   | B   | A   | A   | B   | A  | C   | C  | A   | A |
| MSAT520037 | 5   | 67.4 | 20.04 | B   | B   | B   | A   | A   | B   | A  | A   | A   | A   | A   | B   | A  | A   | C  | A   | A |
| MSAT5.12   | 5   | 71.6 | 21.42 | A   | B   | B   | A   | B   | B   | A  | A   | A   | A   | A   | B   | A  | B   | A  | C   | A |
| JV6162     | 5   | 74.2 | 22.53 | A   | B   | B   | A   | B   | B   | A  | A   | A   | A   | A   | B   | A  | B   | A  | C   | A |
| JV7576     | 5   | 79.1 | 23.88 | A   | B   | B   | A   | B   | B   | A  | A   | A   | A   | A   | B   | A  | B   | A  | C   | A |
| MSAT5.19   | 5   | 85   | 25.92 | B   | A   | B   | A   | B   | B   | A  | A   | A   | A   | A   | B   | A  | B   | B  | C   | A |
| K919       | 5   | 91.2 | 26.98 | B   | B   | B   | A   | B   | C   | B  | A   | A   | A   | A   | B   | A  | D   | B  | A   | A |

A: Shahdara genetic background; B: Bay-0 genetic background; C: heterozygous (genetic markers delimiting the polymorphic region for every HIF validating additive QTL found in the Bay-0 x Shahdara RIL family); D: not available.

**Table 6.** Effect of *Arabidopsis thaliana* plant genotype on flowering time in near-isogenic lines, validating additive QTLs found in the Bay-0 x Shahdara RIL family, following the heterogeneous inbred families (HIFs) strategy.

| QTL     | HIF | Factors |        |                    |                 |        |                    |         |         |                      |                 |        |                    |       |        |                    |      |        |                     |       |       |               |       |
|---------|-----|---------|--------|--------------------|-----------------|--------|--------------------|---------|---------|----------------------|-----------------|--------|--------------------|-------|--------|--------------------|------|--------|---------------------|-------|-------|---------------|-------|
|         |     | block   |        |                    | block x Bay-Sha |        |                    | Bay-Sha |         |                      | family(Bay-Sha) |        |                    | Lov-5 |        |                    | Bg-2 |        |                     | Error |       | LSM PTT (PTU) |       |
|         |     | d.f.    | MS     | F                  | d.f.            | MS     | F                  | d.f.    | MS      | F                    | d.f.            | MS     | F                  | d.f.  | MS     | F                  | d.f. | MS     | F                   | d.f.  | MS    | Bay           | Sha   |
| QTL1.17 | 100 | 2       | 9.3    | 0.05 <sup>ns</sup> | 2               | 40.9   | 0.23 <sup>ns</sup> | 1       | 3452.4  | 19.67 <sup>***</sup> | 2               | 121.0  | 0.69 <sup>ns</sup> | 1     | 415.0  | 2.36 <sup>ns</sup> | 1    | 595.3  | 3.39 <sup>ns</sup>  | 36    | 175.5 | 455.7         | 438.1 |
| QTL1.17 | 408 | 2       | 733.0  | 2.31 <sup>ns</sup> | 2               | 182.6  | 0.57 <sup>ns</sup> | 1       | 3793.5  | 11.95 <sup>ns</sup>  | 2               | 641.4  | 2.02 <sup>ns</sup> | 1     | 126.8  | 0.40 <sup>ns</sup> | 1    | 323.0  | 1.02 <sup>ns</sup>  | 36    | 317.6 | 463.3         | 444.9 |
| QTL2.4  | 144 | 2       | 725.0  | 1.59 <sup>ns</sup> | 2               | 746.4  | 1.64 <sup>ns</sup> | 1       | 2595.4  | 5.71 <sup>-</sup>    | 1               | 132.3  | 0.29 <sup>ns</sup> | 1     | 1893.3 | 4.16 <sup>ns</sup> | 1    | 210.9  | 0.46 <sup>ns</sup>  | 25    | 454.8 | 421           | 441.7 |
| QTL2.10 | 416 | 2       | 730.0  | 4.81 <sup>-</sup>  | 0               | -      | -                  | 1       | 12749.9 | 84.07 <sup>***</sup> | 1               | 6.3    | 0.04 <sup>ns</sup> | 1     | 313.9  | 2.07 <sup>ns</sup> | 1    | 1.3    | 0.01 <sup>ns</sup>  | 17    | 151.6 | 528.9         | 439.2 |
| QTL3.8  | 192 | 2       | 829.5  | 2.02 <sup>ns</sup> | 2               | 81.4   | 0.20 <sup>ns</sup> | 1       | 8446.1  | 20.52 <sup>***</sup> | 2               | 1106.7 | 2.69 <sup>ns</sup> | 1     | 5.9    | 0.01 <sup>ns</sup> | 1    | 4782.3 | 11.62 <sup>**</sup> | 36    | 411.6 | 404.9         | 433.1 |
| QTL3.8  | 404 | 2       | 1107.1 | 5.98 <sup>**</sup> | 2               | 512.8  | 2.77 <sup>ns</sup> | 1       | 1155.8  | 6.24 <sup>-</sup>    | 2               | 254.8  | 1.38 <sup>ns</sup> | 1     | 414.3  | 2.24 <sup>ns</sup> | 1    | 65.7   | 0.35 <sup>ns</sup>  | 36    | 185.2 | 478.2         | 488.4 |
| QTL4.1  | 11  | 2       | 1297.5 | 2.91 <sup>ns</sup> | 2               | 1092.7 | 2.45 <sup>ns</sup> | 1       | 2123.2  | 4.76 <sup>-</sup>    | -               | -      | -                  | 1     | 26.3   | 0.06 <sup>ns</sup> | 1    | 2992.7 | 6.71 <sup>-</sup>   | 15    | 446.2 | 365.8         | 388.2 |
| QTL4.1  | 203 | 2       | 295.9  | 0.70 <sup>ns</sup> | 2               | 583.6  | 1.39 <sup>ns</sup> | 1       | 7650.1  | 18.17 <sup>***</sup> | 2               | 1192.0 | 2.83 <sup>ns</sup> | 1     | 131.5  | 0.31 <sup>ns</sup> | 1    | 1304.2 | 3.10 <sup>ns</sup>  | 35    | 421.0 | 412.8         | 439.2 |
| QTL4.1  | 367 | 2       | 964.4  | 4.21 <sup>-</sup>  | 2               | 600.9  | 2.63 <sup>ns</sup> | 1       | 6394.8  | 27.94 <sup>***</sup> | 2               | 353.8  | 1.55 <sup>ns</sup> | 1     | 1035.3 | 4.52 <sup>-</sup>  | 1    | 40.7   | 0.18 <sup>ns</sup>  | 35    | 228.8 | 439.7         | 463.8 |
| QTL4.1  | 143 | 2       | 69.7   | 0.47 <sup>ns</sup> | 2               | 7.7    | 0.05 <sup>ns</sup> | 1       | 793.3   | 5.31 <sup>-</sup>    | 2               | 79.8   | 0.53 <sup>ns</sup> | 1     | 694.8  | 4.65 <sup>-</sup>  | 1    | 82.6   | 0.55 <sup>ns</sup>  | 35    | 149.5 | 440.1         | 448.8 |
| QTL4.1  | 181 | 2       | 3763.0 | 4.69 <sup>-</sup>  | 2               | 750.0  | 0.93 <sup>ns</sup> | 1       | 12851.8 | 16.00 <sup>***</sup> | 2               | 1188.4 | 1.48 <sup>ns</sup> | 1     | 469.6  | 0.58 <sup>ns</sup> | 1    | 47.7   | 0.06 <sup>ns</sup>  | 33    | 803.0 | 354           | 389.5 |
| QTL4.1  | 312 | 2       | 1451.3 | 4.56 <sup>-</sup>  | 2               | 80.0   | 0.25 <sup>ns</sup> | 1       | 4201.6  | 13.21 <sup>***</sup> | 2               | 213.3  | 0.67 <sup>ns</sup> | 1     | 677.6  | 2.13 <sup>ns</sup> | 1    | 0.1    | 0.00 <sup>ns</sup>  | 35    | 318.1 | 421.2         | 440.6 |
| QTL4.6  | 90  | 2       | 416.7  | 0.57 <sup>ns</sup> | 2               | 402.5  | 0.55 <sup>ns</sup> | 1       | 3556.7  | 4.89 <sup>-</sup>    | 2               | 2965.3 | 4.08 <sup>-</sup>  | 1     | 1857.7 | 2.55 <sup>ns</sup> | 1    | 806.6  | 1.11 <sup>ns</sup>  | 31    | 727.3 | 377.2         | 396.5 |
| QTL5.11 | 397 | 2       | 492.7  | 3.54 <sup>ns</sup> | 2               | 116.2  | 0.83 <sup>ns</sup> | 1       | 1129.5  | 8.11 <sup>-</sup>    | -               | -      | -                  | 1     | 666.4  | 4.79 <sup>-</sup>  | 1    | 80.6   | 0.58 <sup>ns</sup>  | 14    | 139.2 | 439.4         | 455.5 |
| QTL5.11 | 48  | 2       | 1470.0 | 5.37 <sup>**</sup> | 2               | 151.3  | 0.55 <sup>ns</sup> | 1       | 1378.2  | 5.04 <sup>-</sup>    | 2               | 535.4  | 1.96 <sup>ns</sup> | 1     | 15.3   | 0.06 <sup>ns</sup> | 1    | 153.5  | 0.56 <sup>ns</sup>  | 28    | 273.6 | 427.1         | 414.6 |
| QTL5.16 | 108 | 2       | 4514.2 | 7.80 <sup>**</sup> | 2               | 3540.7 | 6.12 <sup>-</sup>  | 1       | 7251.7  | 12.53 <sup>**</sup>  | -               | -      | -                  | 1     | 3981.4 | 6.88 <sup>-</sup>  | 1    | 2398.4 | 4.14 <sup>ns</sup>  | 14    | 578.8 | 463.5         | 426.5 |

LSM PTT: Least-square means of photothermal time (expressed in photothermal units) for Bay-0 and Shahdara allele.

d.f.: Degrees of freedom; MS: mean square; \*0.05 > P > 0.01, \*\*0.01 > P > 0.001, \*\*\*P < 0.001, ns: not significant.

A ‘family(Bay-0-Sha)’ factor controls for the effect of “independent fixed plant” during the process of NIL creation (see Materials and Methods section). ‘-’ indicates that only 1 family was available in both genetic backgrounds.

**Table 7.** Comparison of the QTLs detected in this study and the QTLs found in Simon et al, 2009 (shaded area of the table). The comparison is presented for the 5 RIL families that were used in Simon *et al.* (2008). “CI” stands for “Confidence Interval”. Values for Simon *et al.* (2008) were obtained by re-analyzing their data with QTLnetwork 2.0. The “Overlapping” column contains a “X” symbol whenever QTLs found in both study overlap.

| family | Flowering time measured in the field 07-08 (PTU) |          |             |                        | Flowering time in GH conditions (Simon <i>et al.</i> , 2008) |          |             |                        | Overlapping |
|--------|--------------------------------------------------|----------|-------------|------------------------|--------------------------------------------------------------|----------|-------------|------------------------|-------------|
|        | QTL                                              | position | CI          | Col allele effect sign | QTL                                                          | position | CI          | Col allele effect sign |             |
| 7RV    |                                                  |          |             |                        | 1-15                                                         | 84.1     | 80.8-89.0   | -                      |             |
|        |                                                  |          |             |                        | 2-7                                                          | 38.8     | 29.5-42.1   | +                      |             |
|        |                                                  |          |             |                        | 2-9                                                          | 48.7     | 47.6-53.3   | +                      |             |
|        | 3-13                                             | 71.5     | 66.6-74.1   | +                      |                                                              |          |             |                        |             |
|        | 4-6                                              | 20.7     | 14.3-25.1   | +                      |                                                              |          |             |                        |             |
|        | 4-10                                             | 44.9     | 38.6-51.3   | +                      |                                                              |          |             |                        |             |
|        |                                                  |          |             |                        | 4-15                                                         | 68.8     | 63.4-73.5   | -                      |             |
|        | 5-4                                              | 13.7     | 12.0-15.1   | +                      |                                                              |          |             |                        |             |
|        |                                                  |          |             |                        | 5-11                                                         | 52.1     | 48.1-55.8   | -                      |             |
|        | 5-20                                             | 89.4     | 85.3-93.3   | +                      | 5-20                                                         | 92.9     | 90.4-95.3   | +                      | X           |
| 8RV    | 1-1                                              | 1.5      | 0.3-2.7     | +                      | 1-1                                                          | 1.9      | 0.0-4.0     | +                      | X           |
|        | 1-23                                             | 135.8    | 130.2-137.9 | +                      |                                                              |          |             |                        |             |
|        |                                                  |          |             |                        | 3-13                                                         | 57.9     | 55.1-64.1   | +                      |             |
|        | 4-12                                             | 57.9     | 52.7-61.5   | +                      |                                                              |          |             |                        |             |
|        | 5-3                                              | 17.3     | 14.0-22.5   | -                      | 5-3                                                          | 16.9     | 9.5-22.7    | -                      | X           |
|        | 5-7                                              | 33.1     | 30.5-35.4   | -                      |                                                              |          |             |                        |             |
|        |                                                  |          |             |                        | 5-8                                                          | 41.7     | 37.5-46.0   | -                      |             |
|        | 5-18                                             | 111.1    | 108.3-112.7 | +                      | 5-18                                                         | 111      | 105.7-112.7 | +                      | X           |
| 13RV   | 1-20                                             | 93.2     | 89.9-96.2   | +                      |                                                              |          |             |                        |             |
|        | 2-7                                              | 27.1     | 22.8-31.4   | -                      |                                                              |          |             |                        |             |
|        | 2-14                                             | 61.2     | 58.3-61.2   | +                      |                                                              |          |             |                        |             |
|        | 3-6                                              | 8        | 1.4-11.0    | +                      |                                                              |          |             |                        |             |
|        | 4-11                                             | 50.6     | 42.9-53.7   | -                      |                                                              |          |             |                        |             |
|        | 5-3                                              | 10.3     | 8.1-11.9    | +                      | 5-3                                                          | 10.9     | 9.3-13.6    | +                      | X           |
|        | 5-17                                             | 83       | 80.0-85.4   | +                      | 5-17                                                         | 84       | 79.8-87.6   | +                      | X           |
| 20RV   | 1-4                                              | 8.3      | 0.0-11.8    | -                      |                                                              |          |             |                        |             |
|        | 1-10                                             | 41.9     | 40.3-45.9   | -                      | 1-9                                                          | 40       | 35.1-45.9   | -                      | X           |
|        |                                                  |          |             |                        | 1-16                                                         | 74.6     | 73.1-77.7   | -                      |             |
|        |                                                  |          |             |                        | 4-1                                                          | 0        | 0.0-3.0     | -                      |             |
|        | 4-10                                             | 37.6     | 35.3-40.0   | -                      | 4-8                                                          | 28.8     | 24.5-35.7   | -                      | X           |
|        | 5-4                                              | 10.7     | 9.6-14.9    | +                      |                                                              |          |             |                        |             |
|        | 5-17                                             | 74.3     | 70.9-76.8   | -                      | 5-16                                                         | 72.8     | 65.9-75.9   | -                      | X           |
| 21RV   |                                                  |          |             |                        | 1-6                                                          | 36       | 29.1-48.7   | -                      |             |
|        | 3-13                                             | 67.5     | 61.1-70.1   | +                      | 3-11                                                         | 51.3     | 37.5-66.8   | +                      | X           |
|        |                                                  |          |             |                        | 4-1                                                          | 1.5      | 0.0-5.3     | -                      |             |
|        | 4-8                                              | 50.6     | 44.9-53.8   | +                      |                                                              |          |             |                        |             |
|        | 5-2                                              | 9.7      | 7.3-13.7    | +                      |                                                              |          |             |                        |             |
|        |                                                  |          |             |                        | 5-17                                                         | 100.8    | 97.8-100.8  | +                      |             |

**Table 8.** Enrichment ratios as a function of the number of top SNPs chosen in the GWA mapping results using EMMA. The mean and the corresponding 95% confidence interval from the null distributions (respectively mean, low and high) are presented for SNPs close to candidate genes (CG) and/or QTLs.

| Number of top SNPs | Observed enrichment QTL | Expected enrichment QTL |      |      | Observed enrichment CG | Expected enrichment CG |      |      | Observed enrichment CG + QTL | Expected enrichment CG + QTL |      |      |
|--------------------|-------------------------|-------------------------|------|------|------------------------|------------------------|------|------|------------------------------|------------------------------|------|------|
|                    |                         | Mean                    | Low  | High |                        | Mean                   | Low  | High |                              | Mean                         | Low  | High |
| 50                 | 1.07                    | 0.99                    | 0.51 | 1.46 | 4.10                   | 1.04                   | 0.00 | 3.82 | 7.44                         | 1.02                         | 0.00 | 5.34 |
| 100                | 0.97                    | 0.99                    | 0.63 | 1.34 | 3.00                   | 0.97                   | 0.14 | 2.60 | 5.32                         | 0.96                         | 0.00 | 3.46 |
| 200                | 1.1                     | 1.00                    | 0.67 | 1.36 | 2.66                   | 1.00                   | 0.27 | 2.19 | 4.52                         | 1.00                         | 0.13 | 2.79 |
| 300                | 1.03                    | 1.01                    | 0.64 | 1.37 | 2.09                   | 0.98                   | 0.32 | 2.25 | 3.20                         | 1.04                         | 0.18 | 3.01 |
| 400                | 1.1                     | 1.00                    | 0.66 | 1.30 | 2.08                   | 1.01                   | 0.41 | 2.01 | 2.99                         | 1.00                         | 0.27 | 2.66 |
| 500                | 1.07                    | 1.01                    | 0.71 | 1.32 | 1.88                   | 0.97                   | 0.44 | 1.76 | 2.45                         | 1.01                         | 0.34 | 2.58 |
| 1000               | 1.06                    | 1.00                    | 0.77 | 1.25 | 1.61                   | 0.99                   | 0.63 | 1.54 | 1.97                         | 1.01                         | 0.45 | 1.89 |
| 2000               | 1.07                    | 1.00                    | 0.84 | 1.16 | 1.43                   | 1.00                   | 0.70 | 1.35 | 1.65                         | 1.01                         | 0.59 | 1.56 |
| 3000               | 1.08                    | 1.00                    | 0.86 | 1.12 | 1.37                   | 1.00                   | 0.71 | 1.33 | 1.60                         | 1.00                         | 0.66 | 1.43 |





**Table 9. (continued)**

| Gene      | chr. | EMMA | Wilc. | overlapping QTLs | Pathway                            | LD | LDV | SD | SDV | 0W | 2W | 4W | 8W | FLC | FRI | FT10 | FT16 | FT22 | 8WGHFT | 0WGHFT | FTGH |   |
|-----------|------|------|-------|------------------|------------------------------------|----|-----|----|-----|----|----|----|----|-----|-----|------|------|------|--------|--------|------|---|
| CDF3      | 3    | X    |       | 33               | circadian clock                    |    |     |    |     |    |    |    |    |     |     |      |      |      |        |        |      |   |
| KIN2      | 5    | X    |       | 20               | cold and ABA inducible protein     |    |     |    |     |    |    |    |    |     |     |      |      |      |        |        |      |   |
| COL1      | 5    | X    |       | 20               | circadian clock                    |    |     |    |     |    |    |    | X  |     |     |      |      |      |        |        |      |   |
| CKB1      | 5    | X    |       | -                | circadian clock                    |    |     |    |     |    |    |    |    |     |     |      |      |      |        |        |      |   |
| DDF2      | 1    | X    |       | -                | gibberellin                        |    |     |    |     |    |    |    |    |     |     |      |      |      |        |        |      |   |
| CCA1      | 2    | X    |       | -                | circadian clock                    |    |     |    |     |    |    |    |    |     |     |      |      |      |        |        |      |   |
| AP1       | 1    | X    |       | -                | floral meristem identity           |    |     |    |     |    |    |    |    |     |     |      |      |      |        |        |      |   |
| TOR1      | 4    | X    |       | -                | ?                                  |    |     |    |     |    |    |    |    |     |     |      |      |      |        |        |      |   |
| GI        | 1    | X    |       | -                | circadian clock                    | X  |     |    |     |    |    |    |    |     |     |      |      |      |        |        |      |   |
| PMI15     | 5    | X    |       | -                | light-dependent                    |    |     |    |     |    |    |    |    |     |     |      |      |      |        |        |      |   |
| SRR1      | 5    |      | X     | 2,6,7,8,13,23,33 | circadian clock                    |    |     |    |     |    |    |    |    |     |     |      |      |      |        |        |      |   |
| AT5G59570 | 5    |      | X     | 7,8,13,20,21,33  | circadian clock? associated to LUX |    |     |    |     |    |    |    |    |     |     |      |      |      |        |        |      |   |
| FY        | 5    |      | X     | 1,8,19,20        | autonomous                         |    |     |    |     |    |    |    |    |     |     |      |      |      |        |        |      |   |
| GA1       | 4    |      | X     | 3,17,19          | gibberellin                        | X  |     |    |     | X  |    |    |    |     |     |      |      |      |        |        |      |   |
| MMP       | 1    |      | X     | 2,13,19          | senescence-associated              |    |     |    |     |    |    |    |    |     |     |      |      |      |        |        |      |   |
| ATGA2OX7  | 1    |      | X     | 3                | gibberellin                        |    |     | X  | X   | X  | X  | X  | X  |     |     |      |      | X    | X      |        |      |   |
| LKP2      | 2    |      | X     | 13               | circadian clock                    |    |     | X  |     |    |    |    |    |     |     |      |      |      |        |        |      |   |
| CUL4      | 5    |      | X     | 33               | light-dependent                    |    |     |    |     |    |    |    | X  |     | X   |      |      |      |        |        |      |   |
| DDF1      | 1    |      | X     | 20               | gibberellin                        |    |     | X  | X   |    |    |    |    |     |     |      |      |      |        |        |      | X |
| FPA       | 2    |      | X     | 33               | autonomous                         |    |     |    |     |    |    |    |    |     |     |      |      |      |        |        |      |   |
| GASA5     | 3    |      | X     | -                | gibberellin                        |    |     |    |     |    |    |    | X  |     |     | X    | X    |      | X      | X      |      |   |
| AGL16     | 3    |      | X     | -                | ?                                  |    | X   |    |     |    |    |    |    |     |     |      |      |      |        |        |      |   |
| AGL17     | 2    |      | X     | -                | light-dependent                    | X  | X   |    |     | X  | X  | X  |    | X   |     | X    | X    | X    | X      | X      | X    | X |

**Table 10.** List of candidate regions associated with flowering time scored in the field with no obvious candidate gene.

| GWA method | Chromosome | Position (bp) |
|------------|------------|---------------|
| EMMA       | 1          | 13,410,964    |
| EMMA       | 1          | 27,060,739    |
| EMMA       | 2          | 9,762,418     |
| EMMA       | 3          | 10,183,643    |
| EMMA       | 3          | 3,273,516     |
| EMMA       | 5          | 2,402,568     |
| EMMA       | 5          | 1,993,499     |
| EMMA       | 5          | 18,617,347    |
| Wilcoxon   | 3          | 16,045,391    |

**Table 11.** Names, crosses and number of lines for each RIL family phenotyped during the field experiment.

| RIL families<br>CRB code <sup>a</sup> | Crosses          | Number of lines | Number of<br>genotyped markers |
|---------------------------------------|------------------|-----------------|--------------------------------|
| 2RV                                   | Bla-1 x Col-0    | 259             | 78                             |
| 3RV                                   | Tsu-0 x Col-0    | 276             | 79                             |
| 4RV                                   | Nok-1 x Col-0    | 223             | 85                             |
| 6RV                                   | Ri-0 x Col-0     | 286             | 85                             |
| 7RV                                   | Ct-1 x Col-0     | 377             | 85                             |
| 8RV                                   | Cvi x Col-0      | 366             | 90                             |
| 13RV                                  | Shahdara x Col-0 | 345             | 96                             |
| 17RV                                  | Ge-0 x Col-0     | 338             | 92                             |
| 19RV                                  | Can-0 x Col-0    | 371             | 94                             |
| 20RV                                  | Bur-0 x Col-0    | 343             | 97                             |
| 21RV                                  | Blh-1 x Col-0    | 315             | 75                             |
| 23RV                                  | Yo-0 x Col-0     | 456             | 82                             |
| 33RV                                  | Bay-0 x Shahdara | 411             | 69                             |

<sup>a</sup> CRB = Centre de Ressources Biologiques (INRA Versailles)

**Table 12.** List of the 282 *a priori* candidate genes for flowering time.

| Name       | LocusTag  | Start    | End      | Name       | LocusTag  | Start    | End      |
|------------|-----------|----------|----------|------------|-----------|----------|----------|
| LHY        | AT1G01060 | 33379    | 37840    | HAP2C      | AT1G72830 | 27409118 | 27411630 |
| CRY2       | AT1G04400 | 1185549  | 1188516  | MIF1       | AT1G74660 | 28051237 | 28051788 |
| CKL13      | AT1G04440 | 1202254  | 1205802  | AT1G74670  | AT1G74670 | 28056947 | 28057810 |
| STO        | AT1G06040 | 1828412  | 1829889  | ASHH1      | AT1G76710 | 28794623 | 28797570 |
| PAP3       | AT1G09530 | 3076584  | 3079541  | FLM        | AT1G77080 | 28960531 | 28964990 |
| PHYA       | AT1G09570 | 3095258  | 3100359  | EFS        | AT1G77300 | 29044816 | 29053704 |
| HYL1       | AT1G09700 | 3137769  | 3140355  | ATGA2OX1   | AT1G78440 | 29516492 | 29517944 |
| AT1G10588  | AT1G10588 | 3501146  | 3501905  | NUA        | AT1G79280 | 29824069 | 29837871 |
| DDF1       | AT1G12610 | 4289942  | 4291015  | GA2        | AT1G79460 | 29895285 | 29899480 |
| LWD1       | AT1G12190 | 4394895  | 4396289  | ELF7       | AT1G79730 | 30005431 | 30008898 |
| RAV1       | AT1G13260 | 4542165  | 4543739  | ATGA3OX4   | AT1G80330 | 30202953 | 30204429 |
| GAI        | AT1G14920 | 5149221  | 5151349  | GA4H       | AT1G80340 | 30205585 | 30207092 |
| GA4        | AT1G15550 | 5344473  | 5346161  | MOS3       | AT1G80680 | 30328900 | 30333661 |
| ATARP4     | AT1G18450 | 6348100  | 6351968  | RGA1       | AT2G01570 | 255248   | 257549   |
| AT1G22690  | AT1G22690 | 8027287  | 8028114  | CAND1      | AT2G02560 | 689787   | 697595   |
| GI         | AT1G22770 | 8061833  | 8067705  | PKS1       | AT2G02950 | 854946   | 856537   |
| SEPALLATA3 | AT1G24260 | 8593631  | 8596087  | SEPALLATA4 | AT2G03710 | 1129265  | 1131835  |
| PFT1       | AT1G25540 | 8969052  | 8974647  | CR88       | AT2G04030 | 1281838  | 1286101  |
| CAL        | AT1G26310 | 9100140  | 9103590  | ELF8       | AT2G06210 | 2428900  | 2436684  |
| ATGA2OX2   | AT1G30040 | 10537632 | 10539815 | AT2G14900  | AT2G14900 | 6411257  | 6412412  |
| UFO        | AT1G30950 | 11036161 | 11037489 | PHYB       | AT2G18790 | 8146963  | 8151512  |
| AT1G30960  | AT1G30960 | 11037593 | 11040014 | LKP2       | AT2G18915 | 8201654  | 8204565  |
| SUF4       | AT1G30970 | 11040262 | 11043732 | FVE        | AT2G19520 | 8463018  | 8466607  |
| FRL2       | AT1G31814 | 11412589 | 11414483 | PIL5       | AT2G20180 | 8711105  | 8713973  |
| VIP1       | AT1G43700 | 16486671 | 16488681 | FIO1       | AT2G21070 | 9047944  | 9050609  |
| ATGA2OX5   | AT1G44090 | 16763117 | 16764926 | SVP        | AT2G22540 | 9586954  | 9590973  |
| CH1        | AT1G44446 | 16850799 | 16853664 | AGL17      | AT2G22630 | 9625452  | 9629037  |
| GCR1       | AT1G48270 | 17831621 | 17834088 | CLF        | AT2G23380 | 9962650  | 9967439  |
| RTV1       | AT1G49480 | 18317846 | 18320313 | COL3       | AT2G24790 | 10573977 | 10575224 |
| ATGA2OX7   | AT1G50960 | 18893217 | 18895387 | ELF3       | AT2G25930 | 11066113 | 11070402 |
| AT1G52800  | AT1G52800 | 19667712 | 19669030 | BAS1       | AT2G26710 | 11387570 | 11390690 |
| SPA4       | AT1G53090 | 19787020 | 19790570 | ATC        | AT2G27550 | 11780328 | 11781758 |
| SPL4       | AT1G53160 | 19810087 | 19811276 | SYD        | AT2G28290 | 12063290 | 12080160 |
| AT1G55080  | AT1G55080 | 20556678 | 20557921 | TOE1       | AT2G28550 | 12233028 | 12235620 |
| ORTH2      | AT1G57820 | 21417835 | 21421611 | AT2G30810  | AT2G30810 | 13134903 | 13135743 |
| ARR3       | AT1G59940 | 22069282 | 22070638 | COP1       | AT2G32950 | 13985010 | 13990612 |
| ATGA2OX4   | AT1G60980 | 22456238 | 22457805 | SPL3       | AT2G33810 | 14312077 | 14313148 |
| VIP5       | AT1G61040 | 22486872 | 22489634 | FES1       | AT2G33835 | 14318863 | 14321776 |
| ATSCO1     | AT1G62750 | 23237099 | 23240112 | ATGA2OX3   | AT2G34555 | 14564067 | 14565776 |
| LDL1       | AT1G62830 | 23268155 | 23270867 | FHY1       | AT2G37678 | 15808543 | 15809871 |
| DDF2       | AT1G63030 | 23371072 | 23372075 | SNZ        | AT2G39250 | 16395964 | 16398151 |
| FT         | AT1G65480 | 24335091 | 24337597 | AT2G39540  | AT2G39540 | 16507944 | 16508319 |
| RGL1       | AT1G66350 | 24751858 | 24753706 | HOS1       | AT2G39810 | 16619878 | 16625135 |
| FKF1       | AT1G68050 | 25512339 | 25514552 | ELF4       | AT2G40080 | 16741372 | 16741990 |
| AP1        | AT1G69120 | 25985993 | 25989976 | SHP2       | AT2G42830 | 17827332 | 17831090 |
| AT1G69935  | AT1G69935 | 26345464 | 26346789 | PIF4       | AT2G43010 | 17893504 | 17896127 |
| MMP        | AT1G70170 | 26427537 | 26429019 | FPA        | AT2G43410 | 18032324 | 18038320 |
| AGL12      | AT1G71692 | 26956307 | 26958789 | CKB4       | AT2G44680 | 18433621 | 18435432 |
| AT1G72050  | AT1G72050 | 27118686 | 27121132 | AGL6       | AT2G45650 | 18811424 | 18813596 |

**Table 12. (continued)**

| Name       | LocusTag  | Start    | End      |
|------------|-----------|----------|----------|
| SOC1       | AT2G45660 | 18814612 | 18818121 |
| SPA1       | AT2G46340 | 19029246 | 19034486 |
| APRR9      | AT2G46790 | 19239718 | 19242156 |
| CCA1       | AT2G46830 | 19252741 | 19255983 |
| AT2G47310  | AT2G47310 | 19430754 | 19434347 |
| RFI2       | AT2G47700 | 19559384 | 19561654 |
| MBD9       | AT3G01460 | 173323   | 182461   |
| SEPALLATA2 | AT3G02310 | 464286   | 467081   |
| COL2       | AT3G02380 | 487243   | 488700   |
| GASA5      | AT3G02885 | 638028   | 639062   |
| ATVGT1     | AT3G03090 | 700463   | 704776   |
| AT3G04510  | AT3G04510 | 1215642  | 1216964  |
| FLK        | AT3G04610 | 1250559  | 1254879  |
| HST        | AT3G05040 | 1401277  | 1408203  |
| ATGID1A    | AT3G05120 | 1430477  | 1432784  |
| ATHAP2B    | AT3G05690 | 1676552  | 1678938  |
| AT3G06910  | AT3G06910 | 2178636  | 2181203  |
| AtPRMT4b   | AT3G06930 | 2185149  | 2189393  |
| COL9       | AT3G07650 | 2441663  | 2444538  |
| AT3G10185  | AT3G10185 | 3145584  | 3146204  |
| FLD        | AT3G10390 | 3229298  | 3231824  |
| ATMYB65    | AT3G11440 | 3602099  | 3605110  |
| SPY        | AT3G11540 | 3631893  | 3637961  |
| PIE1       | AT3G12810 | 4065049  | 4074085  |
| LDL2       | AT3G13682 | 4479200  | 4481516  |
| SPL5       | AT3G15270 | 5140372  | 5141355  |
| SPA3       | AT3G15354 | 5169102  | 5172844  |
| VRN1       | AT3G18990 | 6548875  | 6551859  |
| HAF2       | AT3G19040 | 6567163  | 6575288  |
| ATFYPP3    | AT3G19980 | 6961742  | 6965114  |
| DDL        | AT3G20550 | 7174470  | 7177948  |
| FIE        | AT3G20740 | 7248815  | 7252458  |
| AT3G21320  | AT3G21320 | 7499059  | 7501847  |
| TIC        | AT3G22380 | 7912912  | 7919517  |
| VRN5       | AT3G24440 | 8876034  | 8878178  |
| TEL1       | AT3G26120 | 9547635  | 9550423  |
| LWD2       | AT3G26640 | 9794457  | 9795694  |
| FUS3       | AT3G26790 | 9855065  | 9857226  |
| BR6OX2     | AT3G30180 | 11813216 | 11816244 |
| ATARP6     | AT3G33520 | 14104642 | 14106535 |
| PCL1       | AT3G46640 | 17194075 | 17196203 |
| CDF3       | AT3G47500 | 17514985 | 17517043 |
| REF6       | AT3G48430 | 17946594 | 17951731 |
| AMP1       | AT3G54720 | 20265703 | 20268826 |
| SMZ        | AT3G54990 | 20384695 | 20387499 |
| AGL16      | AT3G57230 | 21188689 | 21191911 |
| AT3G57300  | AT3G57300 | 21210467 | 21218864 |
| AGL18      | AT3G57390 | 21244678 | 21246888 |
| GIS        | AT3G58070 | 21517590 | 21518631 |

| Name      | LocusTag  | Start    | End      |
|-----------|-----------|----------|----------|
| SHP1      | AT3G58780 | 21749437 | 21752884 |
| PIL6      | AT3G59060 | 21838955 | 21841484 |
| CKB3      | AT3G60250 | 22281312 | 22283088 |
| AGL13     | AT3G61120 | 22629234 | 22631466 |
| PIL2      | AT3G62090 | 22999522 | 23001684 |
| ATGID1B   | AT3G63010 | 23300400 | 23302461 |
| CRP       | AT4G00450 | 203471   | 211003   |
| FRI       | AT4G00650 | 269026   | 271503   |
| AT4G00690 | AT4G00690 | 281645   | 283129   |
| ETC3      | AT4G01060 | 460472   | 461085   |
| EZA1      | AT4G02020 | 886600   | 891955   |
| LD        | AT4G02560 | 1123490  | 1128421  |
| GA1       | AT4G02780 | 1237767  | 1244813  |
| DFL2      | AT4G03400 | 1497535  | 1499864  |
| PDF2      | AT4G04890 | 2476487  | 2482343  |
| CRY1      | AT4G08920 | 5724100  | 5727250  |
| GASA2     | AT4G09610 | 6074767  | 6075642  |
| SPA2      | AT4G11110 | 6771601  | 6777221  |
| AGL14     | AT4G11880 | 7143109  | 7147216  |
| pEARLI 1  | AT4G12480 | 7406102  | 7406934  |
| COP9      | AT4G14110 | 8132881  | 8134915  |
| ELIP2     | AT4G14690 | 8418278  | 8419258  |
| FAR1      | AT4G15090 | 8614063  | 8618142  |
| AT4G15180 | AT4G15180 | 8651406  | 8662587  |
| ESD4      | AT4G15880 | 9012660  | 9016131  |
| PHYD      | AT4G16250 | 9195617  | 9199501  |
| FCA       | AT4G16280 | 9206613  | 9214841  |
| HAT4      | AT4G16780 | 9449133  | 9450762  |
| AT4G16810 | AT4G16810 | 9459889  | 9462272  |
| VRN2      | AT4G16845 | 9476162  | 9479897  |
| CKB2      | AT4G17640 | 9825210  | 9827285  |
| PHYE      | AT4G18130 | 10042149 | 10046094 |
| TSF       | AT4G20370 | 11000782 | 11003007 |
| ATGA2OX8  | AT4G21200 | 11302695 | 11306611 |
| ATGA3OX3  | AT4G21690 | 11527241 | 11529072 |
| EBS       | AT4G22140 | 11727738 | 11730521 |
| AGL19     | AT4G22950 | 12023926 | 12027432 |
| AT4G23340 | AT4G23340 | 12195463 | 12196803 |
| AGL24     | AT4G24540 | 12670975 | 12674082 |
| PGI1      | AT4G24620 | 12708762 | 12712835 |
| GA5       | AT4G25420 | 12990894 | 12992468 |
| FWA       | AT4G25530 | 13038369 | 13042452 |
| TOR1      | AT4G27060 | 13581407 | 13585161 |
| CIP7      | AT4G27430 | 13718685 | 13723330 |
| ATHXK1    | AT4G29130 | 14352043 | 14355109 |
| VIP3      | AT4G29830 | 14597667 | 14599306 |
| AT4G30200 | AT4G30200 | 14786639 | 14790509 |
| AtPRMT5   | AT4G31120 | 15132017 | 15136645 |
| FLP1      | AT4G31380 | 15229791 | 15230724 |

**Table 12. (continued)**

| Name      | LocusTag  | Start    | End      |
|-----------|-----------|----------|----------|
| CYP83B1   | AT4G31500 | 15273477 | 15275316 |
| KNAT5     | AT4G32040 | 15494071 | 15496362 |
| ATH1      | AT4G32980 | 15914725 | 15918047 |
| AT4G33280 | AT4G33280 | 16047358 | 16049359 |
| FD        | AT4G35900 | 17004598 | 17006290 |
| AP2       | AT4G36920 | 17400844 | 17403329 |
| HLS1      | AT4G37580 | 17658606 | 17660872 |
| AGL21     | AT4G37940 | 17835689 | 17838615 |
| BRI1      | AT4G39400 | 18324655 | 18328820 |
| FHL       | AT5G02200 | 437458   | 438892   |
| PRR7      | AT5G02810 | 637895   | 641975   |
| LCL1      | AT5G02840 | 648702   | 651970   |
| ATHB51    | AT5G03790 | 1004982  | 1006372  |
| TFL1      | AT5G03840 | 1024640  | 1025811  |
| ELF6      | AT5G04240 | 1169545  | 1174879  |
| CPD       | AT5G05690 | 1702689  | 1706788  |
| MYB33     | AT5G06100 | 1837908  | 1840728  |
| YAP169    | AT5G07200 | 2243554  | 2245340  |
| CHE       | AT5G08330 | 2680745  | 2681814  |
| FLC       | AT5G10140 | 3173498  | 3179449  |
| AT5G10625 | AT5G10625 | 3358788  | 3359782  |
| HY5       | AT5G11260 | 3593381  | 3594993  |
| EMF1      | AT5G11530 | 3695863  | 3701549  |
| HAP2A     | AT5G12840 | 4050694  | 4053609  |
| FY        | AT5G13480 | 4326531  | 4331702  |
| AGL15     | AT5G13790 | 4449017  | 4450846  |
| AT5G14920 | AT5G14920 | 4826482  | 4827983  |
| GASA4     | AT5G15230 | 4944903  | 4946219  |
| CO        | AT5G15840 | 5171185  | 5172761  |
| COL1      | AT5G15850 | 5176094  | 5177900  |
| KIN1      | AT5G15960 | 5209901  | 5210730  |
| KIN2      | AT5G15970 | 5211914  | 5212668  |
| FRL1      | AT5G16320 | 5344505  | 5346022  |
| TFL2      | AT5G17690 | 5827173  | 5829684  |
| ASP2      | AT5G19550 | 6598019  | 6601821  |
| NPH4      | AT5G20730 | 7016447  | 7022115  |
| HUA2      | AT5G23150 | 7785838  | 7792492  |
| APRR5     | AT5G24470 | 8355954  | 8358876  |
| FPF1      | AT5G24860 | 8541781  | 8542452  |
| TNY       | AT5G25810 | 8986774  | 8987790  |
| GA3       | AT5G25900 | 9036021  | 9038409  |
| AT5G27230 | AT5G27230 | 9584095  | 9588052  |
| ATGID1C   | AT5G27320 | 9629090  | 9631213  |
| AT5G28450 | AT5G28450 | 10372942 | 10374194 |
| LSH1      | AT5G28490 | 10454397 | 10455200 |
| PHYC      | AT5G35840 | 14025056 | 14028994 |
| TCH2      | AT5G37770 | 15016084 | 15016849 |
| PMI15     | AT5G38150 | 15240346 | 15242177 |
| CDF2      | AT5G39660 | 15895927 | 15898272 |

| Name      | LocusTag  | Start    | End      |
|-----------|-----------|----------|----------|
| XPB2      | AT5G41360 | 16561568 | 16566508 |
| CIP1      | AT5G41790 | 16744758 | 16750075 |
| CUL4      | AT5G46210 | 18748645 | 18754037 |
| AT5G46910 | AT5G46910 | 19065007 | 19068107 |
| LBA1      | AT5G47010 | 19089236 | 19096561 |
| CKB1      | AT5G47080 | 19141839 | 19143838 |
| PAT1      | AT5G48150 | 19539481 | 19541924 |
| AtPRMT4a  | AT5G49020 | 19888477 | 19892146 |
| EMF2      | AT5G51230 | 20840962 | 20846790 |
| AT5G51310 | AT5G51310 | 20870080 | 20871944 |
| AT2353    | AT5G51810 | 21072414 | 21074034 |
| PGM       | AT5G51820 | 21080594 | 21085283 |
| DFL1      | AT5G54510 | 22148319 | 22150904 |
| ZTL       | AT5G57360 | 23258653 | 23261816 |
| VIN3      | AT5G57380 | 23263621 | 23266730 |
| MSI1      | AT5G58230 | 23573238 | 23575471 |
| SRR1      | AT5G59560 | 24017782 | 24019183 |
| AT5G59570 | AT5G59570 | 24021114 | 24022738 |
| VIP2      | AT5G59710 | 24074633 | 24079144 |
| AT5G59845 | AT5G59845 | 24128550 | 24129246 |
| APRR3     | AT5G60100 | 24215225 | 24218590 |
| TOE2      | AT5G60120 | 24225012 | 24228950 |
| AGL8      | AT5G60910 | 24519708 | 24523369 |
| VIP4      | AT5G61150 | 24620882 | 24624951 |
| TOC1      | AT5G61380 | 24692290 | 24695776 |
| LFY       | AT5G61850 | 24861521 | 24864159 |
| AT5G62040 | AT5G62040 | 24940036 | 24940935 |
| CDF1      | AT5G62430 | 25086319 | 25088160 |
| ELF5      | AT5G62640 | 25166659 | 25169767 |
| LIP1      | AT5G64813 | 25927505 | 25930122 |
| AGL31     | AT5G65050 | 25999480 | 26003552 |
| MAF3      | AT5G65060 | 26004655 | 26008541 |
| MAF4      | AT5G65070 | 26009486 | 26013360 |
| AGL68     | AT5G65080 | 26014730 | 26019691 |
| AT5G65540 | AT5G65540 | 26212915 | 26215548 |
| ICU2      | AT5G67100 | 26794220 | 26802330 |
