# Supplementary material for: Linkage and Association Mapping of Arabidopsis thaliana Flowering Time in Nature
Source: PLOS journal article supplement (doi:10.1371/journal.pgen.1000940), 2010-05-06

# Chromosome 1

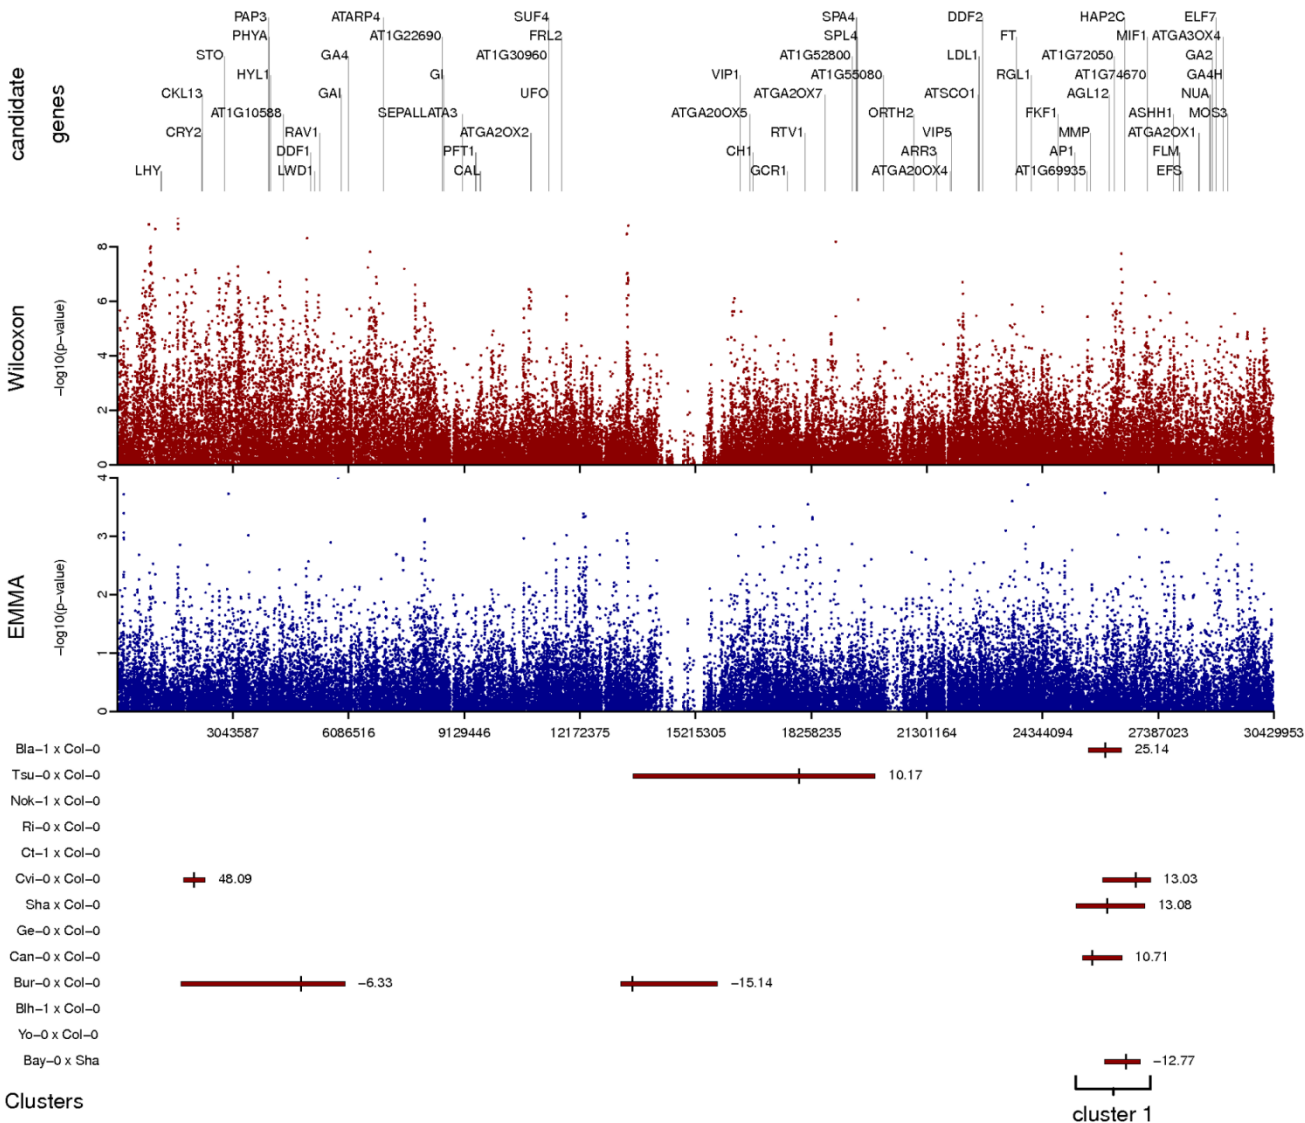

# Chromosome 2

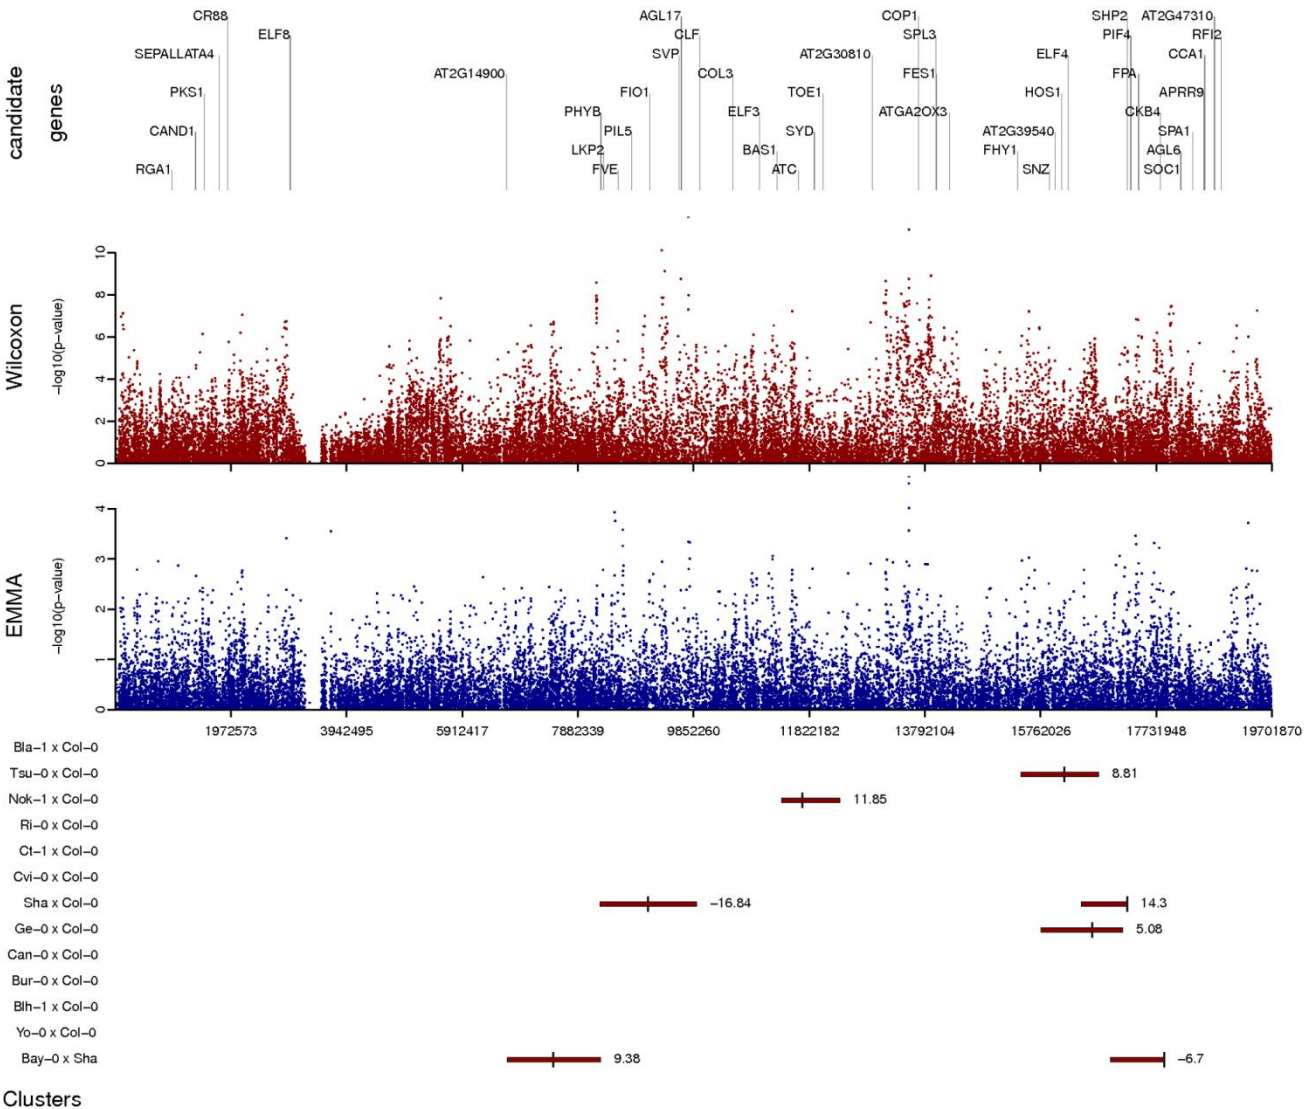

# Chromosome 3

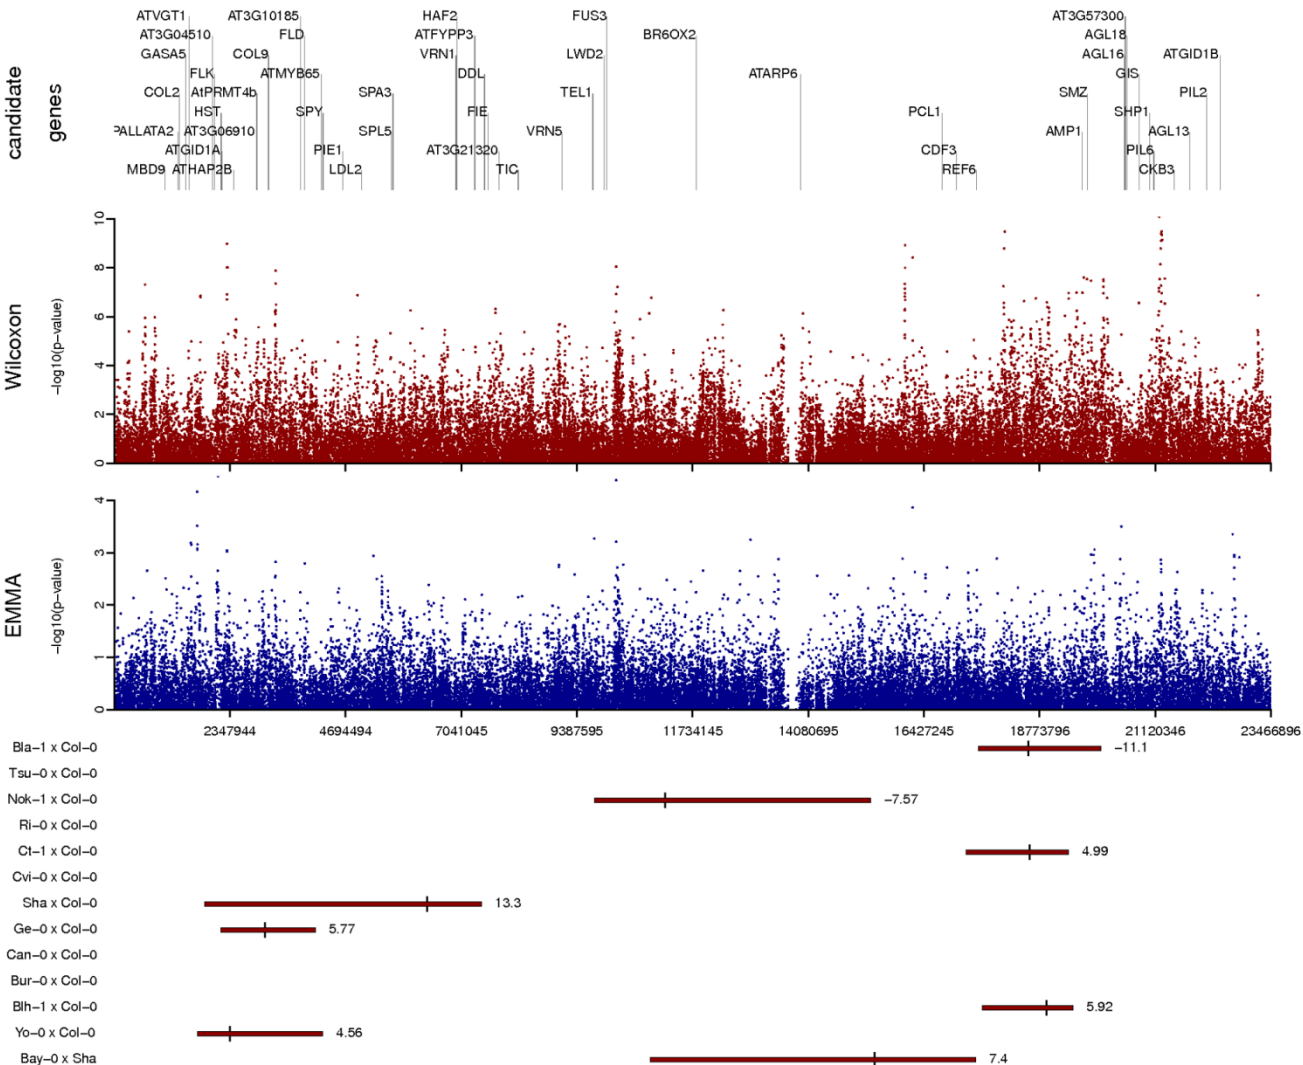

Clusters

# Chromosome 5

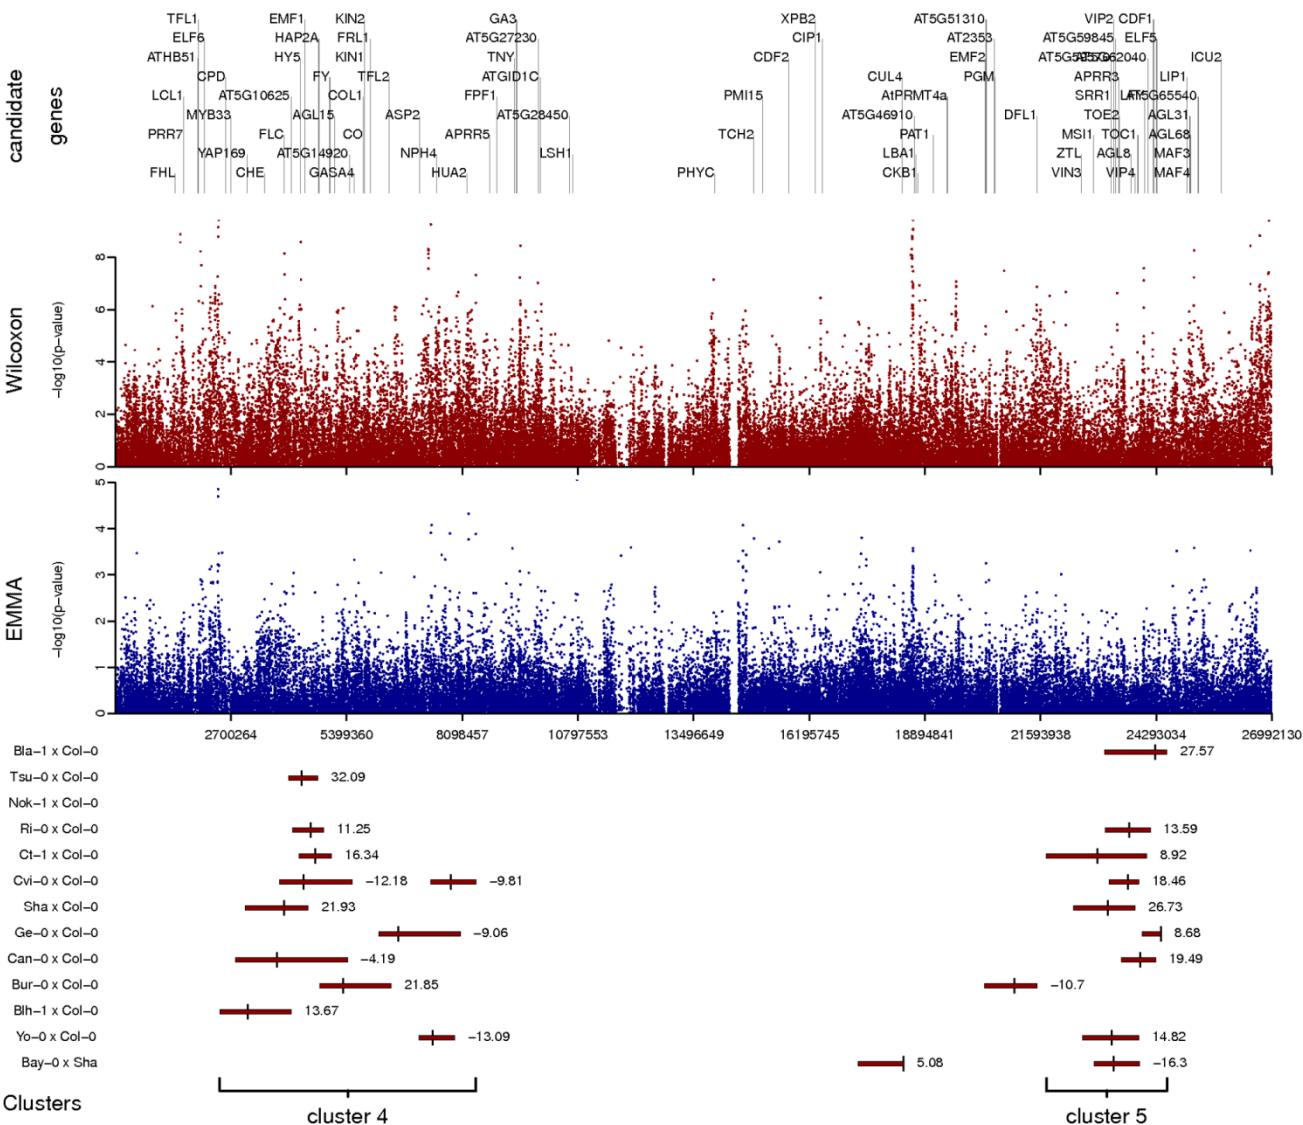

Supplement: S9 (10.1371/journal.pgen.1000940.s009) [file journal.pgen.1000940.s009.pdf › journal.pgen.1000940.s009.pdf]
