# Supplementary material for: Linkage and Association Mapping of Arabidopsis thaliana Flowering Time in Nature
Source: PLOS journal article supplement (doi:10.1371/journal.pgen.1000940), 2010-05-06

# Chromosome 1

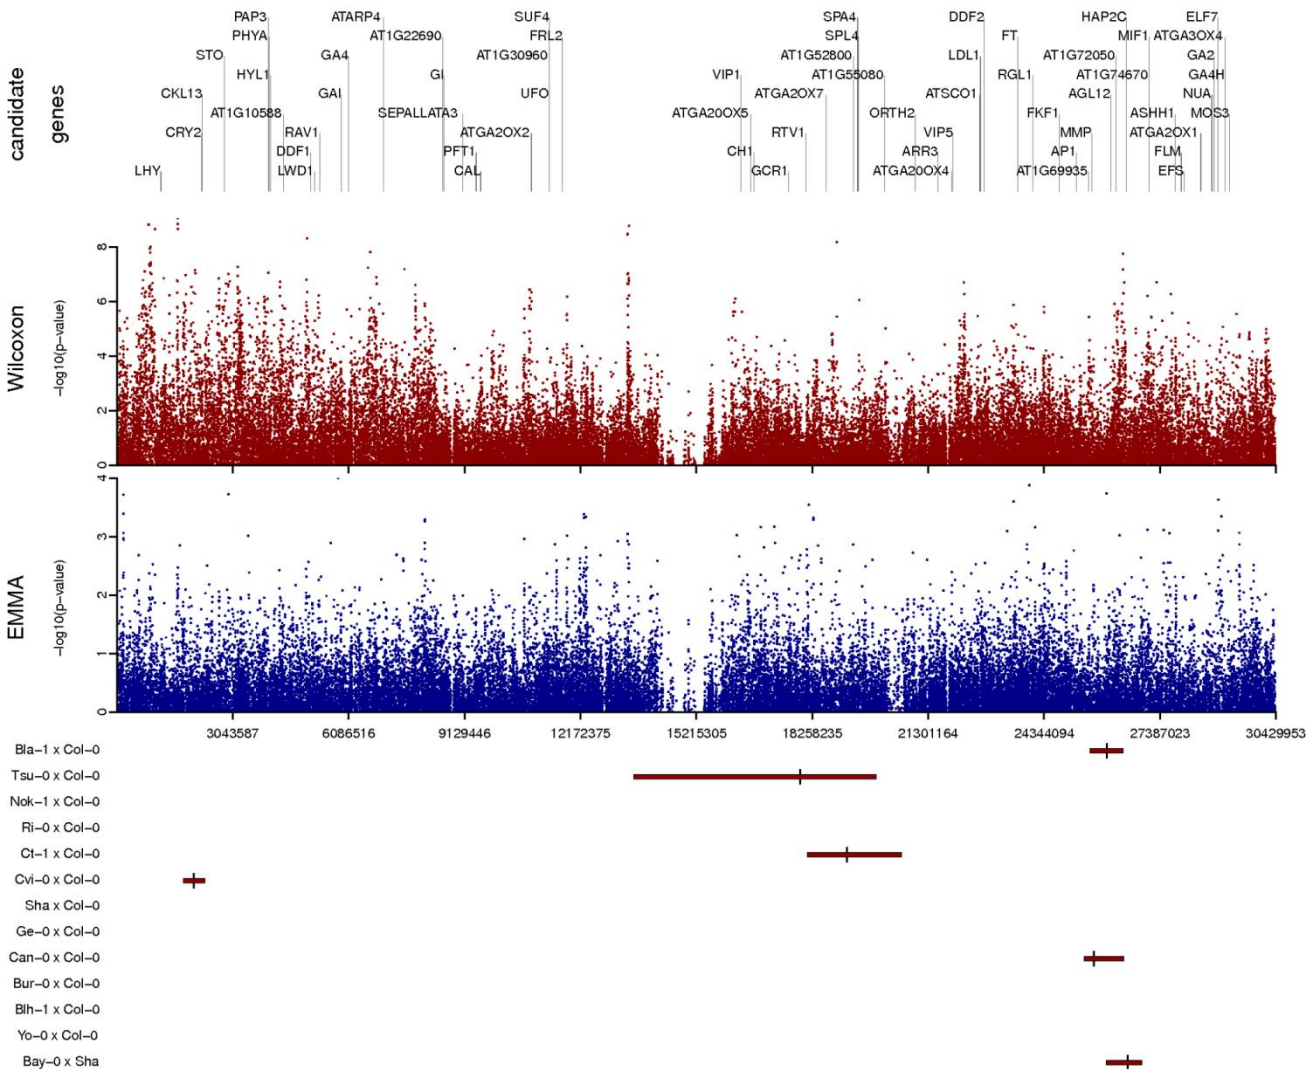

# Chromosome 4

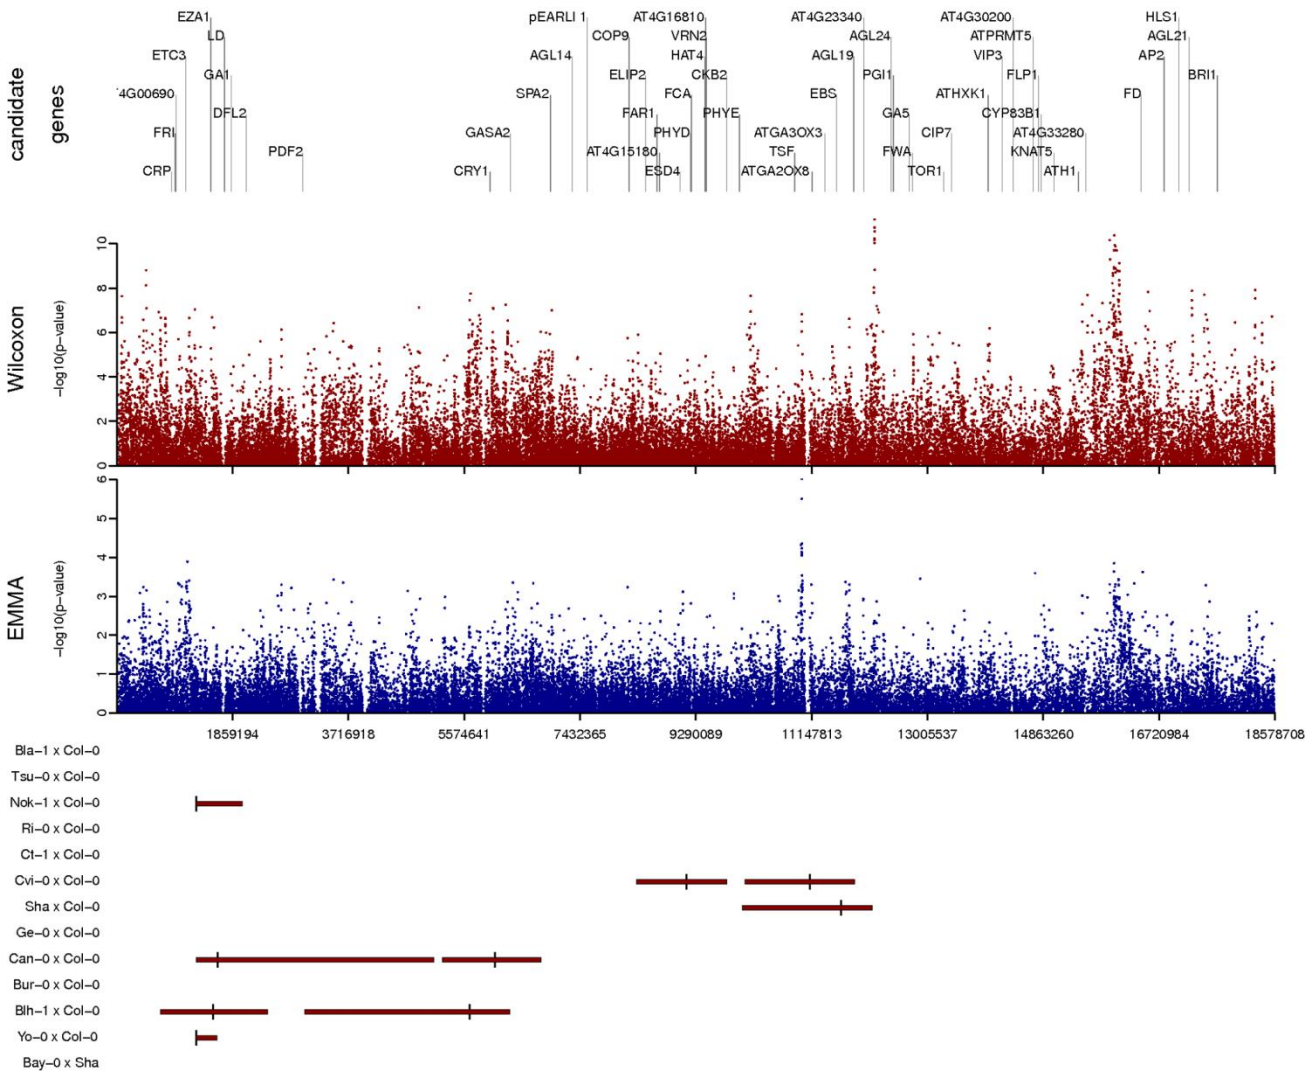

# Chromosome 5

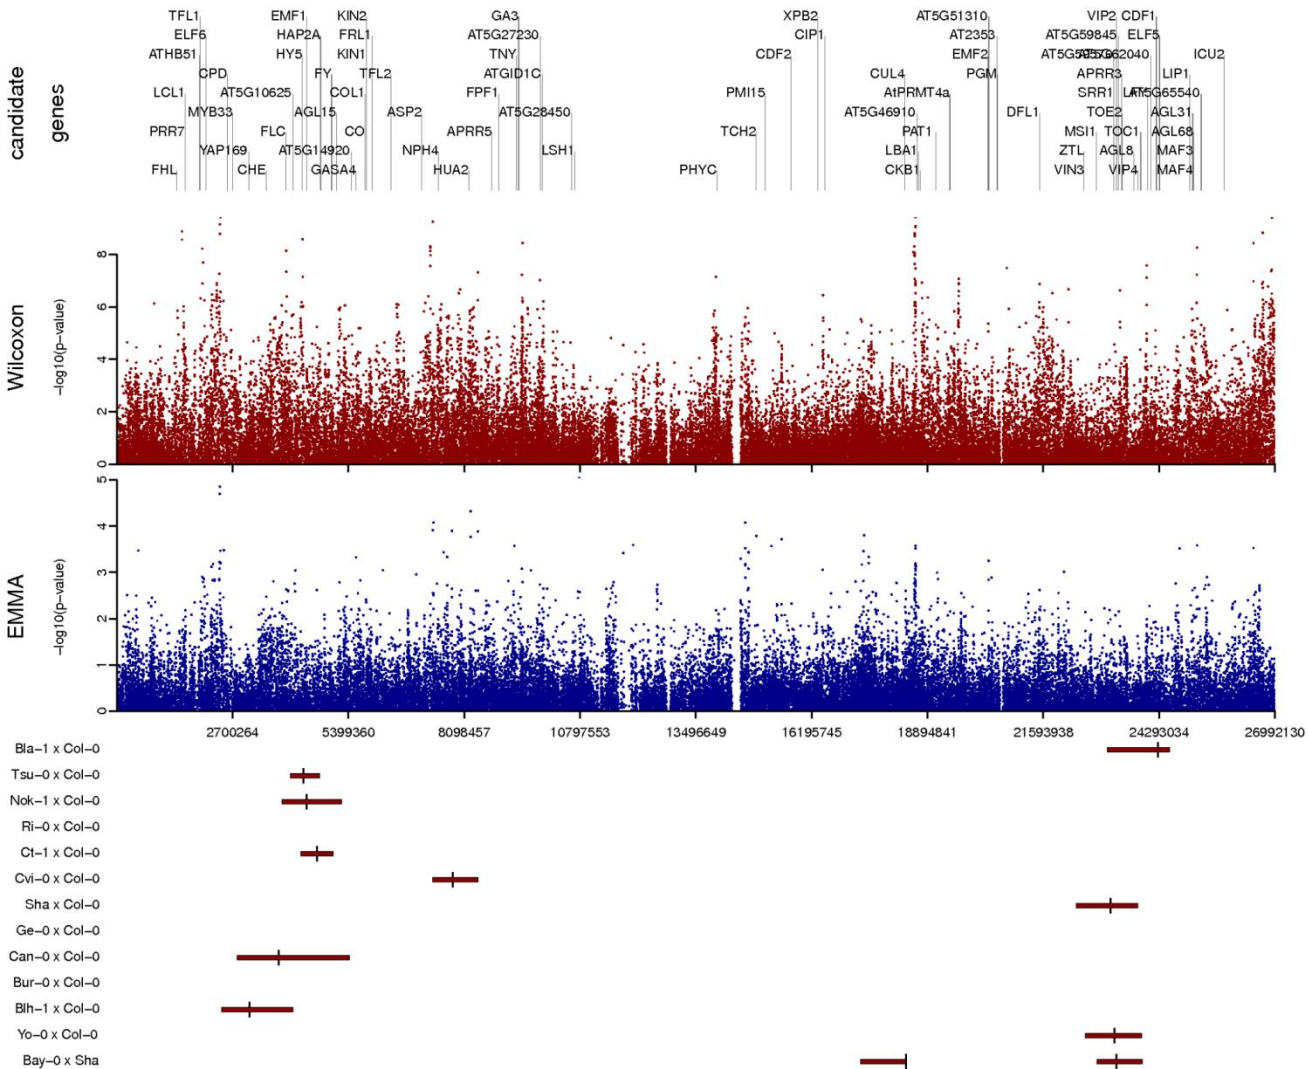

Supplement: S10 (10.1371/journal.pgen.1000940.s010) [file journal.pgen.1000940.s010.pdf › journal.pgen.1000940.s010.pdf]
